# Supplementary material for: Controlling the Deposition Process of Nanoarchitectonic Nanocomposites Based on {Nb6−xTaxXi12}n+ Octahedral Cluster-Based Building Blocks (Xi = Cl, Br; 0 ≤ x ≤ 6, n = 2, 3, 4) for UV-NIR Blockers Coating Applications
Source: MDPI journal article supplement (doi:10.3390/nano12122052), 2022-06-15
Supplement: s1 [file s1]

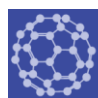

## Supplementary materials

# Controlling the Deposition Process of Nanoarchitectonic Nanocomposites Based on $\{\text{Nb}_{6-x}\text{Ta}_x\text{X}^i_{12}\}^{n+}$ Octahedral Cluster-Based Building Blocks ( $\text{X}^i = \text{Cl}, \text{Br}; 0 \leq x \leq 6, n = 2, 3, 4$ ) for UV-NIR Blockers Coating Applications

Clément Lebastard <sup>1,2,\*</sup>, Maxence Wilmet <sup>1,2,3</sup>, Stéphane Cordier <sup>1</sup>, Clothilde Comby-Zerbino <sup>4</sup>, Luke MacAleese <sup>4</sup>, Philippe Dugourd <sup>4</sup>, Toru Hara <sup>5</sup>, Naoki Ohashi <sup>2,6</sup>, Tetsuo Uchikoshi <sup>2,6</sup> and Fabien Grasset <sup>1,2,\*</sup>

<sup>1</sup> Univ Rennes, CNRS, ISCR, UMR6226, F-35000 Rennes, France;

maxence.wilmet@saint-gobain.com (M.W.); stephane.cordier@univ-rennes1.fr (S.C.)

<sup>2</sup> CNRS-Saint Gobain-NIMS, IRL3629, Laboratory for Innovative Key Materials and Structures (LINK), National Institute for Materials Science (NIMS), 1-1 Namiki, Tsukuba 305-0044, Japan; ohashi.naoki@nims.go.jp (N.O.); uchikoshi.tetsuo@nims.go.jp (T.U.)

<sup>3</sup> Saint Gobain Research Paris, F-93300 Aubervilliers, France;

<sup>4</sup> Univ Lyon, Univ Claude Bernard Lyon 1, CNRS, Institut Lumière Matière, F-69622 Lyon, France; clothilde.comby-zerbino@univ-lyon1.fr (C.C.-Z.); luke.mac-aleese@univ-lyon1.fr (L.M.); philippe.dugourd@univ-lyon1.fr (P.D.)

<sup>5</sup> Research Center for Structural Materials, NIMS, 1-2-1 Sengen, Tsukuba, Ibaraki 305-0047, Japan; hara.toru@nims.go.jp (T.H.)

<sup>6</sup> Research Center for Functional Materials, NIMS, 1-1 Namiki, Tsukuba, Ibaraki 305-0044, Japan

\* Correspondence: lebastard.clementhugo@nims.go.jp (C.L.); fabien.grasset@univ-rennes1.fr (F.G.)

**Table S1.** Characteristic times for the hydrolysis-condensation process of the SiO<sub>2</sub>-PEG matrix.

| pH  | Before hydrolysis | Before condensation |
|-----|-------------------|---------------------|
| 2   | 18 h              | months              |
| 2.5 | 18 h              | several weeks       |
| 3   | 22 h              | several days        |
| 3.5 | ∞                 | 2 days              |
| 4   | ∞                 | 42 h                |
| 5   | ∞                 | 42 h                |
| 6   | ∞                 | 42 h                |
| 7   | ∞                 | 42 h                |

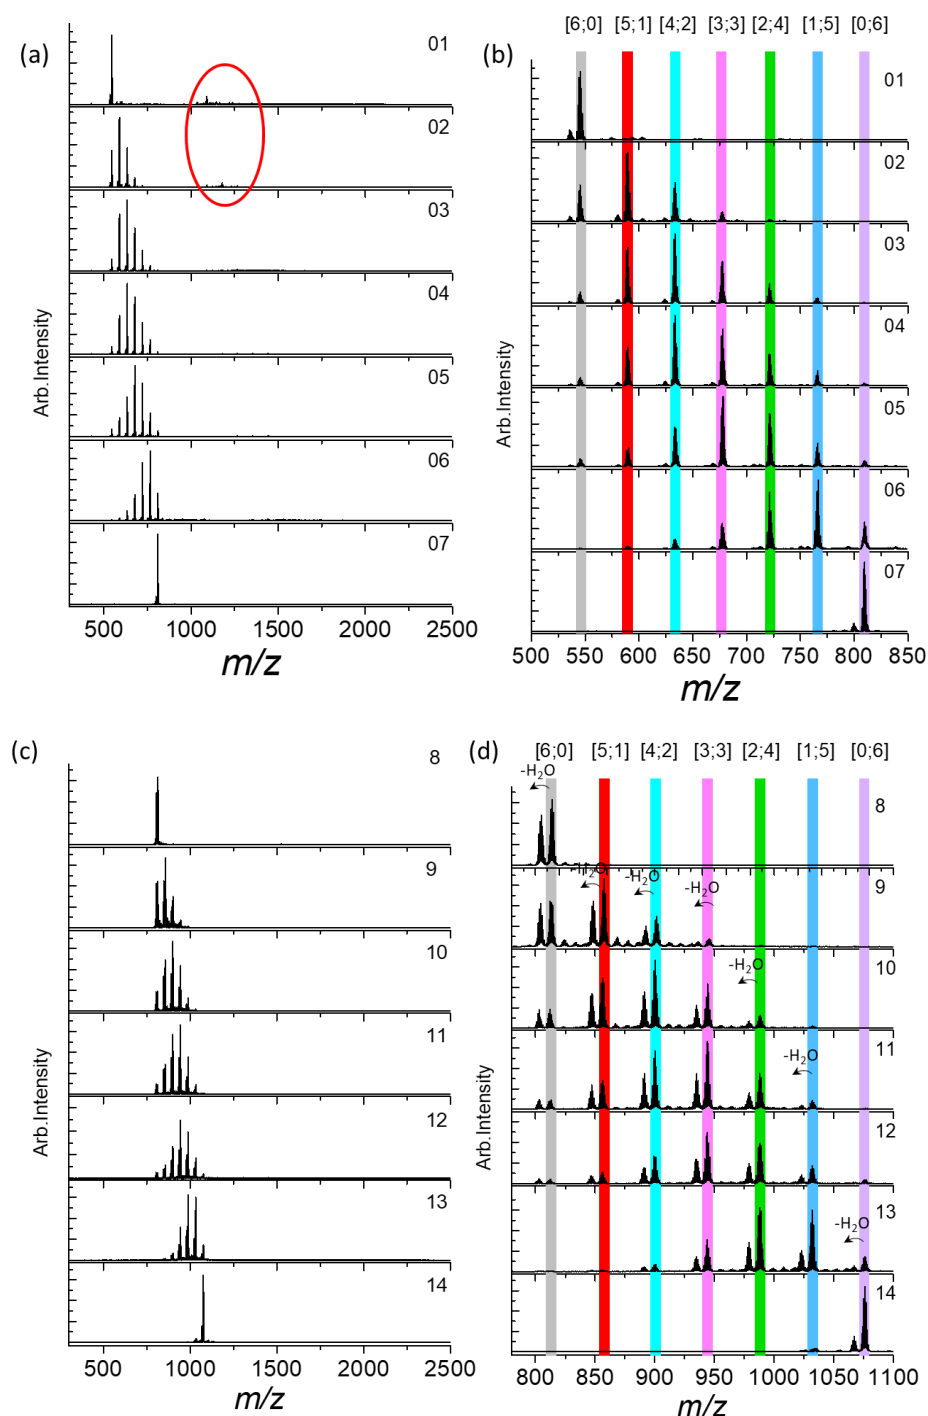

**Figure S1.** Mass spectra in positive mode dispersed in water (a) of  $K_4[Nb_{6-x}Ta_xCl_{12}]Cl_6$  cluster compounds (spectra 01 to 07),  $0 \leq x \leq 6$ . The  $[Nb_5TaCl_{12}](H_2O)_5(OH)^a]^+$  are indicated by a red circle. Parts of the spectra of (a) are zoomed for clarity (b). (c) Mass spectra in positive mode dispersed in water of  $K_4[Nb_{6-x}Ta_xBr_{12}]Br_6$  cluster compounds (spectra 08 to 14),  $0 \leq x \leq 6$ . Parts of the spectra of (c) are zoomed for clarity (d). For (b) and (d), the notations above the spectra correspond to the atoms number [Nb; Ta]. The results for  $x = 0$  and 6 are added for clarity. The species are detailed in table S2.

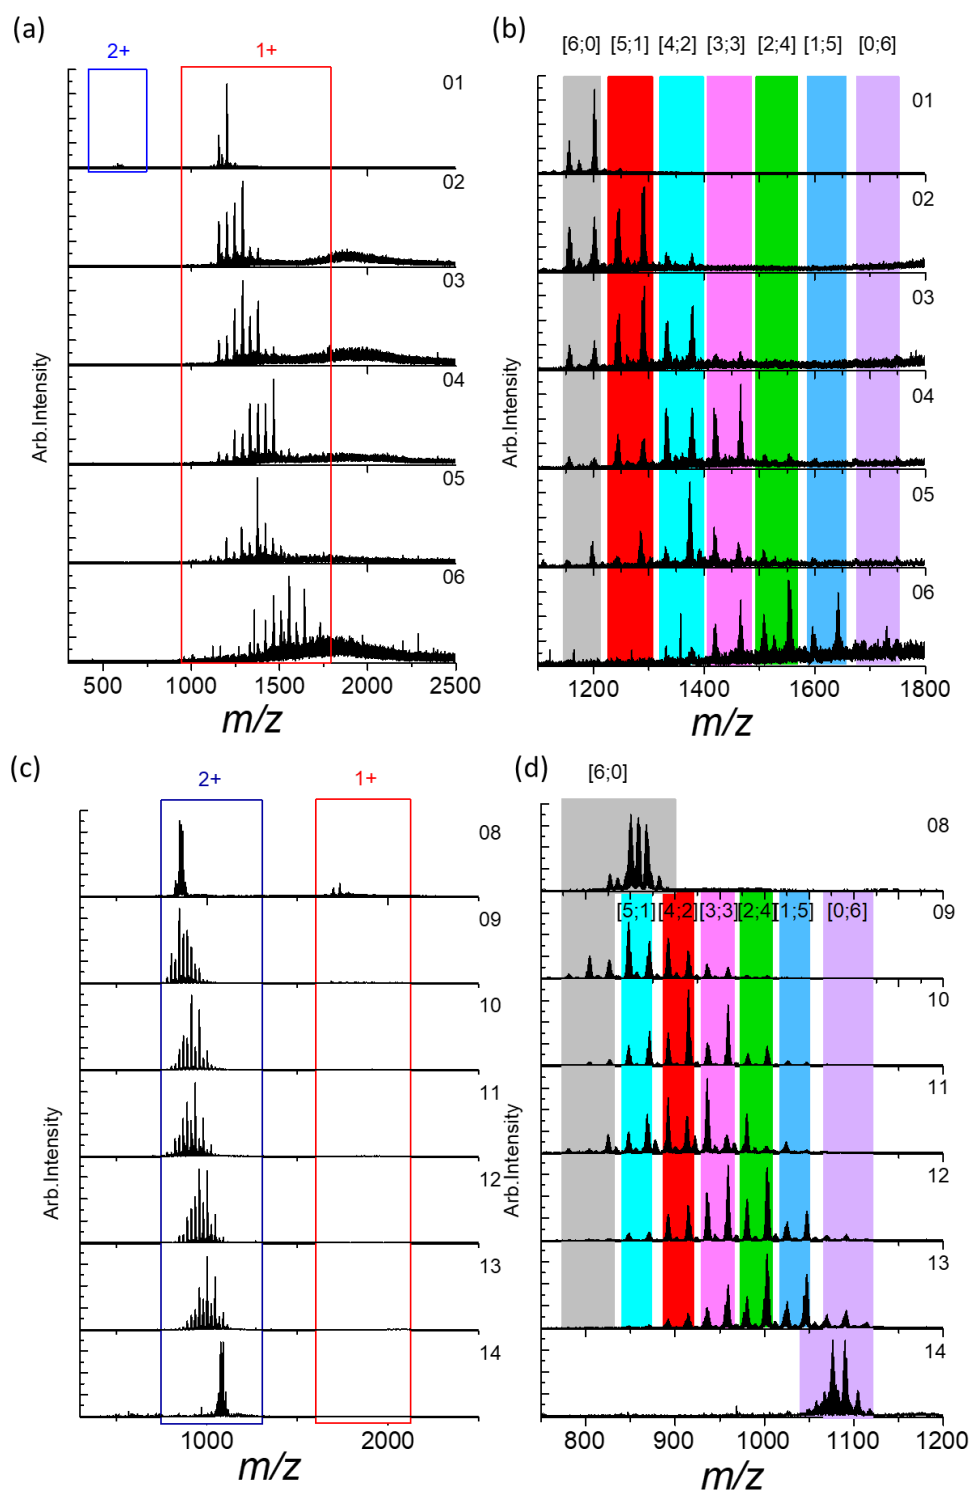

**Figure S2.** Mass spectra in positive mode dispersed in ethanol (a) of  $K_4[Nb_{6-x}Ta_xCl_{12}]Cl_6$  cluster compounds (spectra 01 to 06),  $0 \leq x \leq 5$ ). Note that there are no signals for  $x=6$  in positive mode. Spectra (b) corresponds to the zoom on the 1+ ions area of (a). (c) Mass spectra in positive mode dispersed in ethanol of  $K_4[Nb_{6-x}Ta_xBr_{12}]Br_6$  cluster compounds (spectra 08 to 14),  $0 \leq x \leq 6$ ). Spectra (d) corresponds to the zoom on the 2+ ions area in (c). For (b) and (d), the notations above the spectra correspond to the atoms number [Nb; Ta]. The results for  $x = 0$  and 6 are added for clarity. The species are detailed in table S2.

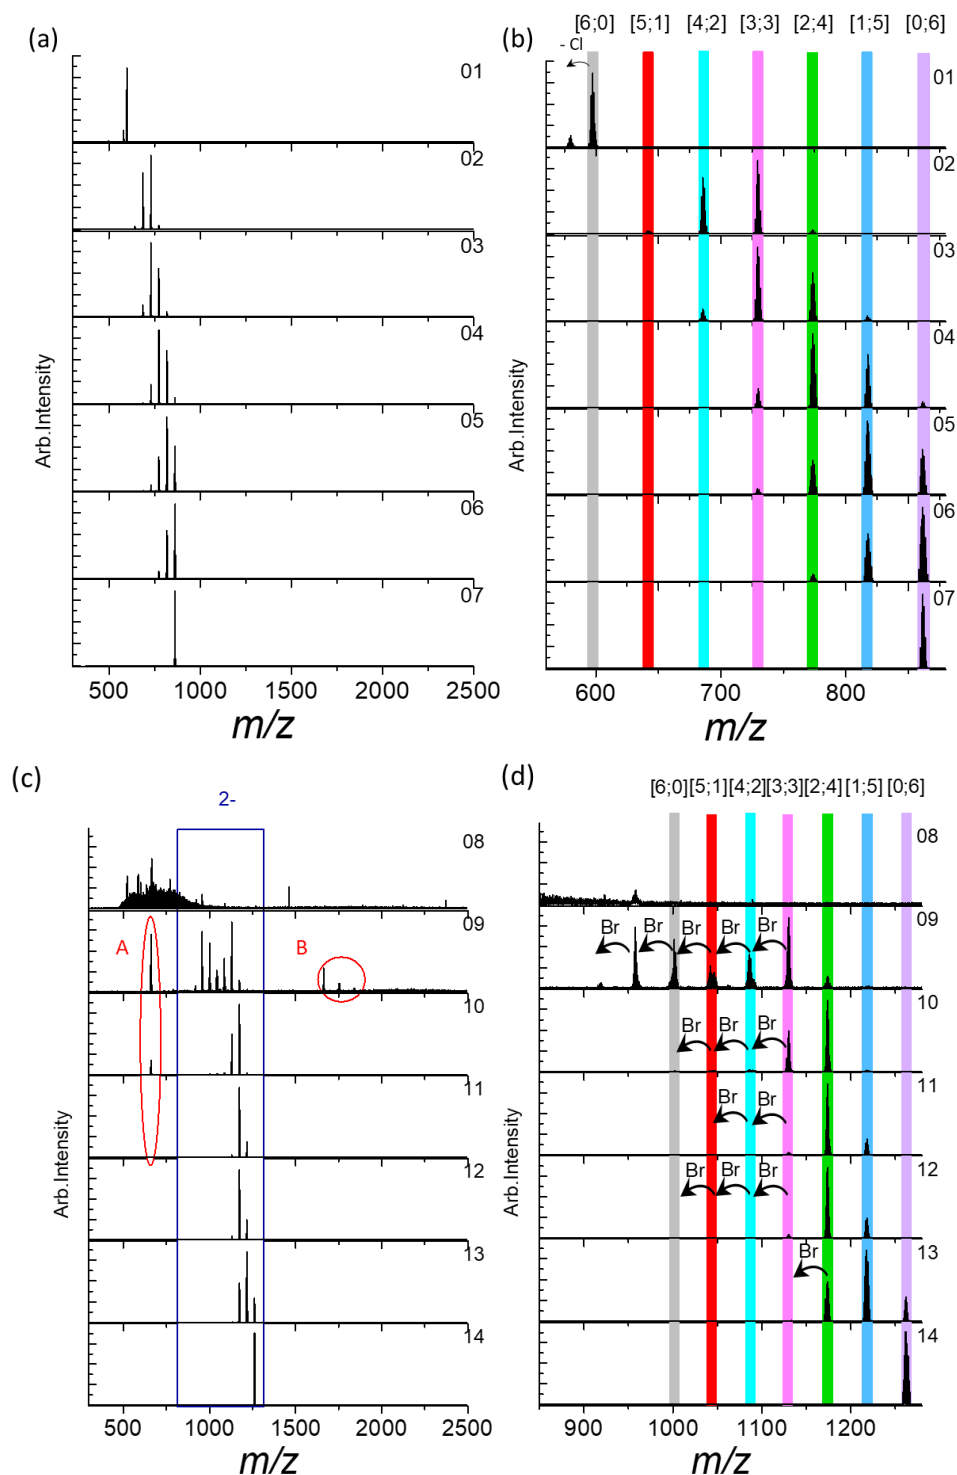

**Figure S3.** Mass spectra in negative mode dispersed in acetone (a) of  $K_4[\{Nb_{6-x}Ta_xCl_{12}\}Cl]^{6-}$  cluster compounds (spectra 01 to 06),  $0 \leq x \leq 6$ . The  $[TaBr_6]^{1-}$  are indicated by the red circle A and  $[Nb_6Br_{15}]^{1-}$ ,  $[Nb_5Br_{15}]^{1-}$ ,  $[NbTa_5Br_{15}]^{1-}$  by the red circle B. Parts of the spectra of (a) are zoomed for clarity (b). (c) Mass spectra in negative mode dispersed in acetone of  $K_4[\{Nb_{6-x}Ta_xBr_{12}\}Br]^{6-}$  cluster compounds (spectra 08 to 14),  $0 \leq x \leq 6$ . Spectra (d) correspond to the zoom on the 2- ions area of (c). For (b) and (d), the notations above the spectra correspond to the atoms number [Nb; Ta]. The results for  $x = 0$  and 6 are added for clarity. The species are detailed in table S2.

**Table S2.** Mass spectra results with major detected ions.

| Cluster compounds                                               | Solvent | Positive mode                                                                                                                     | Negative mode                                                                                            |
|-----------------------------------------------------------------|---------|-----------------------------------------------------------------------------------------------------------------------------------|----------------------------------------------------------------------------------------------------------|
| K <sub>4</sub> Nb <sub>5</sub> TaCl <sub>18</sub>               | Water   | [{Nb <sub>5</sub> TaCl <sub>12</sub> }(H <sub>2</sub> O) <sup>a</sup> <sub>6</sub> ] <sup>2+</sup> (major)                        | -                                                                                                        |
|                                                                 |         | [{Nb <sub>5</sub> TaCl <sub>12</sub> }(H <sub>2</sub> O) <sup>a</sup> <sub>5</sub> (OH) <sup>a</sup> ] <sup>+</sup> (minor)       |                                                                                                          |
|                                                                 |         | [{Nb <sub>6</sub> Cl <sub>12</sub> }(H <sub>2</sub> O) <sup>a</sup> <sub>6</sub> ] <sup>2+</sup> (minor)                          |                                                                                                          |
|                                                                 |         | [{Nb <sub>4</sub> Ta <sub>2</sub> Cl <sub>12</sub> }(H <sub>2</sub> O) <sup>a</sup> <sub>6</sub> ] <sup>2+</sup> (minor)          |                                                                                                          |
|                                                                 | Ethanol | [Nb <sub>5</sub> TaCl <sub>12</sub> (H <sub>2</sub> O) <sub>n</sub> (OH)(EtOH) <sub>m</sub> ] <sup>1+</sup> (major)               | -                                                                                                        |
|                                                                 |         | [Nb <sub>6</sub> Cl <sub>12</sub> (H <sub>2</sub> O) <sub>n</sub> (OH)(EtOH) <sub>m</sub> ] <sup>1+</sup> (minor)                 |                                                                                                          |
| n = 1, 2; m = 3, 4 and n+m = 5                                  |         |                                                                                                                                   |                                                                                                          |
| Acetone                                                         | -       | [{Nb <sub>4</sub> Ta <sub>2</sub> Cl <sub>12</sub> }Cl <sup>a</sup> <sub>6</sub> ] <sup>2-</sup> (major)                          |                                                                                                          |
|                                                                 |         |                                                                                                                                   | [{Nb <sub>3</sub> Ta <sub>3</sub> Cl <sub>12</sub> }Cl <sup>a</sup> <sub>6</sub> ] <sup>2-</sup> (major) |
| K <sub>4</sub> Nb <sub>4</sub> Ta <sub>2</sub> Cl <sub>18</sub> | Water   | [{Nb <sub>4</sub> Ta <sub>2</sub> Cl <sub>12</sub> }(H <sub>2</sub> O) <sup>a</sup> <sub>6</sub> ] <sup>2+</sup> (major)          | -                                                                                                        |
|                                                                 |         | [{Nb <sub>5</sub> TaCl <sub>12</sub> }(H <sub>2</sub> O) <sup>a</sup> <sub>6</sub> ] <sup>2+</sup> (minor)                        |                                                                                                          |
|                                                                 | Ethanol | [Nb <sub>5</sub> TaCl <sub>12</sub> (H <sub>2</sub> O) <sub>n</sub> (OH)(EtOH) <sub>m</sub> ] <sup>1+</sup> (major)               | -                                                                                                        |
|                                                                 |         | Nb <sub>4</sub> Ta <sub>2</sub> Cl <sub>12</sub> (H <sub>2</sub> O) <sub>n</sub> (OH)(EtOH) <sub>m</sub> ] <sup>1+</sup> (minor)  |                                                                                                          |
|                                                                 |         | n = 1, 2; m = 3, 4 and n+m = 5                                                                                                    |                                                                                                          |
|                                                                 | Acetone | -                                                                                                                                 | [{Nb <sub>3</sub> Ta <sub>3</sub> Cl <sub>12</sub> }Cl <sup>a</sup> <sub>6</sub> ] <sup>2-</sup> (major) |
|                                                                 |         |                                                                                                                                   | [{Nb <sub>2</sub> Ta <sub>4</sub> Cl <sub>12</sub> }Cl <sup>a</sup> <sub>6</sub> ] <sup>2-</sup> (minor) |
| K <sub>4</sub> Nb <sub>3</sub> Ta <sub>3</sub> Cl <sub>18</sub> | Water   | [{Nb <sub>3</sub> Ta <sub>3</sub> Cl <sub>12</sub> }(H <sub>2</sub> O) <sup>a</sup> <sub>6</sub> ] <sup>2+</sup> (minor)          | -                                                                                                        |
|                                                                 |         | [{Nb <sub>2</sub> Ta <sub>4</sub> Cl <sub>12</sub> }(H <sub>2</sub> O) <sup>a</sup> <sub>6</sub> ] <sup>2+</sup> (major)          |                                                                                                          |
|                                                                 | Ethanol | [Nb <sub>3</sub> Ta <sub>3</sub> Cl <sub>12</sub> (H <sub>2</sub> O) <sub>n</sub> (OH)(EtOH) <sub>m</sub> ] <sup>1+</sup> (major) | -                                                                                                        |
|                                                                 |         | [Nb <sub>4</sub> Ta <sub>2</sub> Cl <sub>12</sub> (H <sub>2</sub> O) <sub>n</sub> (OH)(EtOH) <sub>m</sub> ] <sup>1+</sup> (minor) |                                                                                                          |
|                                                                 |         | n = 1, 2; m = 3, 4 and n+m = 5                                                                                                    |                                                                                                          |
|                                                                 | Acetone | -                                                                                                                                 | [{Nb <sub>3</sub> Ta <sub>3</sub> Cl <sub>12</sub> }Cl <sup>a</sup> <sub>6</sub> ] <sup>2-</sup> (minor) |
|                                                                 |         |                                                                                                                                   | [{Nb <sub>2</sub> Ta <sub>4</sub> Cl <sub>12</sub> }Cl <sup>a</sup> <sub>6</sub> ] <sup>2-</sup> (major) |
|                                                                 |         |                                                                                                                                   | [{Nb <sub>1</sub> Ta <sub>5</sub> Cl <sub>12</sub> }Cl <sup>a</sup> <sub>6</sub> ] <sup>2-</sup> (minor) |
| K <sub>4</sub> Nb <sub>2</sub> Ta <sub>4</sub> Cl <sub>18</sub> | Water   | [{Nb <sub>2</sub> Ta <sub>4</sub> Cl <sub>12</sub> }(H <sub>2</sub> O) <sup>a</sup> <sub>6</sub> ] <sup>2+</sup> (minor)          | -                                                                                                        |
|                                                                 |         | [{Nb <sub>1</sub> Ta <sub>5</sub> Cl <sub>12</sub> }(H <sub>2</sub> O) <sup>a</sup> <sub>6</sub> ] <sup>2+</sup> (major)          |                                                                                                          |
|                                                                 | Ethanol | [Nb <sub>4</sub> Ta <sub>2</sub> Cl <sub>12</sub> (H <sub>2</sub> O) <sub>n</sub> (OH)(EtOH) <sub>m</sub> ] <sup>1+</sup> (major) | -                                                                                                        |
|                                                                 |         | [Nb <sub>3</sub> Ta <sub>3</sub> Cl <sub>12</sub> (H <sub>2</sub> O) <sub>n</sub> (OH)(EtOH) <sub>m</sub> ] <sup>1+</sup> (major) |                                                                                                          |
|                                                                 |         | n = 1, 2; m = 3, 4 and n+m = 5                                                                                                    |                                                                                                          |
|                                                                 | Acetone | -                                                                                                                                 | [{Nb <sub>2</sub> Ta <sub>4</sub> Cl <sub>12</sub> }Cl <sup>a</sup> <sub>6</sub> ] <sup>2-</sup> (minor) |
|                                                                 |         |                                                                                                                                   | [{Nb <sub>1</sub> Ta <sub>5</sub> Cl <sub>12</sub> }Cl <sup>a</sup> <sub>6</sub> ] <sup>2-</sup> (major) |
|                                                                 |         |                                                                                                                                   | [{Ta <sub>6</sub> Cl <sub>12</sub> }Cl <sup>a</sup> <sub>6</sub> ] <sup>2-</sup> (minor)                 |
| K <sub>4</sub> NbTa <sub>5</sub> Cl <sub>18</sub>               | Water   | [{NbTa <sub>5</sub> Cl <sub>12</sub> }(H <sub>2</sub> O) <sup>a</sup> <sub>6</sub> ] <sup>2+</sup> (major)                        | -                                                                                                        |
|                                                                 |         | [{Nb <sub>2</sub> Ta <sub>4</sub> Cl <sub>12</sub> }(H <sub>2</sub> O) <sup>a</sup> <sub>6</sub> ] <sup>2+</sup> (minor)          |                                                                                                          |
|                                                                 | Ethanol | [Nb <sub>3</sub> Ta <sub>3</sub> Cl <sub>12</sub> (H <sub>2</sub> O) <sub>n</sub> (OH)(EtOH) <sub>m</sub> ] <sup>1+</sup> (minor) | -                                                                                                        |
|                                                                 |         | Nb <sub>2</sub> Ta <sub>4</sub> Cl <sub>12</sub> (H <sub>2</sub> O) <sub>n</sub> (OH)(EtOH) <sub>m</sub> ] <sup>1+</sup> (major)  |                                                                                                          |
|                                                                 |         | [NbTa <sub>5</sub> Cl <sub>12</sub> (H <sub>2</sub> O) <sub>n</sub> (OH)(EtOH) <sub>m</sub> ] <sup>1+</sup>                       |                                                                                                          |

|                                                                                                                                  |                                                                 |                                                                                                                                                                                                                                                                                                                                                                                                                         |                                                                                                                                                                                                                                                                                                                                                                                                                                                                                                                                                                                                                                                                                                                                    |
|----------------------------------------------------------------------------------------------------------------------------------|-----------------------------------------------------------------|-------------------------------------------------------------------------------------------------------------------------------------------------------------------------------------------------------------------------------------------------------------------------------------------------------------------------------------------------------------------------------------------------------------------------|------------------------------------------------------------------------------------------------------------------------------------------------------------------------------------------------------------------------------------------------------------------------------------------------------------------------------------------------------------------------------------------------------------------------------------------------------------------------------------------------------------------------------------------------------------------------------------------------------------------------------------------------------------------------------------------------------------------------------------|
| K <sub>4</sub> Nb <sub>5</sub> TaBr <sub>18</sub>                                                                                | n = 1, 2; m = 3, 4 and n+m = 5                                  |                                                                                                                                                                                                                                                                                                                                                                                                                         |                                                                                                                                                                                                                                                                                                                                                                                                                                                                                                                                                                                                                                                                                                                                    |
|                                                                                                                                  | Acetone                                                         | -                                                                                                                                                                                                                                                                                                                                                                                                                       | [[NbTa <sub>5</sub> Cl <sup>i</sup> <sub>12</sub> ]Cl <sup>a</sup> <sub>6</sub> ] <sup>2-</sup> (minor)<br>[[Ta <sub>6</sub> Cl <sup>i</sup> <sub>12</sub> ]Cl <sup>a</sup> <sub>6</sub> ] <sup>2-</sup> (major)                                                                                                                                                                                                                                                                                                                                                                                                                                                                                                                   |
|                                                                                                                                  | Water                                                           | [[Nb <sub>5</sub> TaBr <sup>i</sup> <sub>12</sub> ](H <sub>2</sub> O) <sup>a</sup> <sub>6</sub> ] <sup>2+</sup> (major)<br>[[Nb <sub>6</sub> Br <sup>i</sup> <sub>12</sub> ](H <sub>2</sub> O) <sup>a</sup> <sub>6</sub> ] <sup>2+</sup> (minor)                                                                                                                                                                        | -                                                                                                                                                                                                                                                                                                                                                                                                                                                                                                                                                                                                                                                                                                                                  |
|                                                                                                                                  | Ethanol                                                         | [Nb <sub>5</sub> TaBr <sub>12</sub> (H <sub>2</sub> O) <sub>n</sub> (EtOH) <sub>m</sub> ] <sup>2+</sup><br>(major)                                                                                                                                                                                                                                                                                                      | -                                                                                                                                                                                                                                                                                                                                                                                                                                                                                                                                                                                                                                                                                                                                  |
|                                                                                                                                  |                                                                 | [Nb <sub>2</sub> Ta <sub>4</sub> Br <sub>12</sub> (H <sub>2</sub> O) <sub>n</sub> (EtOH) <sub>m</sub> ] <sup>2+</sup><br>(minor)                                                                                                                                                                                                                                                                                        |                                                                                                                                                                                                                                                                                                                                                                                                                                                                                                                                                                                                                                                                                                                                    |
|                                                                                                                                  | n = 5, 6; m = 0, 1 and n+m = 6                                  |                                                                                                                                                                                                                                                                                                                                                                                                                         |                                                                                                                                                                                                                                                                                                                                                                                                                                                                                                                                                                                                                                                                                                                                    |
|                                                                                                                                  | Acetone                                                         | -                                                                                                                                                                                                                                                                                                                                                                                                                       | [[Nb <sub>6</sub> Br <sup>i</sup> <sub>12</sub> ]Br <sup>a</sup> <sub>6</sub> ] <sup>2-</sup> (minor)<br>[[Nb <sub>5</sub> Ta <sub>2</sub> Br <sup>i</sup> <sub>12</sub> ]Br <sup>a</sup> <sub>6</sub> ] <sup>2-</sup><br>(minor)<br>[[Nb <sub>4</sub> Ta <sub>2</sub> Br <sup>i</sup> <sub>12</sub> ]Br <sup>a</sup> <sub>6</sub> ] <sup>2-</sup><br>(minor)<br>[[Nb <sub>3</sub> Ta <sub>3</sub> Br <sup>i</sup> <sub>12</sub> ]Br <sup>a</sup> <sub>6</sub> ] <sup>2-</sup> (major)<br>[NbBr <sub>6</sub> ] <sup>1-</sup> (A circle in red)<br>[Nb <sub>6</sub> Br <sub>15</sub> ] <sup>1-</sup> , [Nb <sub>5</sub> Br <sub>15</sub> ] <sup>1-</sup> ,<br>[Nb <sub>5</sub> TaBr <sub>15</sub> ] <sup>1-</sup> (B circle in red) |
|                                                                                                                                  |                                                                 |                                                                                                                                                                                                                                                                                                                                                                                                                         |                                                                                                                                                                                                                                                                                                                                                                                                                                                                                                                                                                                                                                                                                                                                    |
|                                                                                                                                  |                                                                 |                                                                                                                                                                                                                                                                                                                                                                                                                         |                                                                                                                                                                                                                                                                                                                                                                                                                                                                                                                                                                                                                                                                                                                                    |
|                                                                                                                                  | Water                                                           | [[Nb <sub>4</sub> Ta <sub>2</sub> Br <sup>i</sup> <sub>12</sub> ](H <sub>2</sub> O) <sup>a</sup> <sub>6</sub> ] <sup>2+</sup> (major)<br>[[Nb <sub>5</sub> TaBr <sup>i</sup> <sub>12</sub> ](H <sub>2</sub> O) <sup>a</sup> <sub>6</sub> ] <sup>2+</sup> (minor)                                                                                                                                                        | -                                                                                                                                                                                                                                                                                                                                                                                                                                                                                                                                                                                                                                                                                                                                  |
|                                                                                                                                  | K <sub>4</sub> Nb <sub>4</sub> Ta <sub>2</sub> Br <sub>18</sub> | Ethanol                                                                                                                                                                                                                                                                                                                                                                                                                 | [Nb <sub>2</sub> Ta <sub>4</sub> Br <sub>12</sub> (H <sub>2</sub> O) <sub>n</sub> (EtOH) <sub>m</sub> ] <sup>2+</sup><br>(major)                                                                                                                                                                                                                                                                                                                                                                                                                                                                                                                                                                                                   |
| [Nb <sub>3</sub> Ta <sub>3</sub> Br <sub>12</sub> (H <sub>2</sub> O) <sub>n</sub> (EtOH) <sub>m</sub> ] <sup>2+</sup><br>(minor) |                                                                 |                                                                                                                                                                                                                                                                                                                                                                                                                         |                                                                                                                                                                                                                                                                                                                                                                                                                                                                                                                                                                                                                                                                                                                                    |
| n = 5, 6; m = 0, 1 and n+m = 6                                                                                                   |                                                                 |                                                                                                                                                                                                                                                                                                                                                                                                                         |                                                                                                                                                                                                                                                                                                                                                                                                                                                                                                                                                                                                                                                                                                                                    |
| Acetone                                                                                                                          | -                                                               | [[Nb <sub>3</sub> Ta <sub>3</sub> Br <sup>i</sup> <sub>12</sub> ]Br <sup>a</sup> <sub>6</sub> ] <sup>2-</sup> (minor)<br>[[Nb <sub>2</sub> Ta <sub>4</sub> Br <sup>i</sup> <sub>12</sub> ]Br <sup>a</sup> <sub>6</sub> ] <sup>2-</sup> (major)<br>[NbBr <sub>6</sub> ] <sup>1-</sup> (A circle in red)                                                                                                                  |                                                                                                                                                                                                                                                                                                                                                                                                                                                                                                                                                                                                                                                                                                                                    |
|                                                                                                                                  |                                                                 |                                                                                                                                                                                                                                                                                                                                                                                                                         |                                                                                                                                                                                                                                                                                                                                                                                                                                                                                                                                                                                                                                                                                                                                    |
|                                                                                                                                  |                                                                 |                                                                                                                                                                                                                                                                                                                                                                                                                         |                                                                                                                                                                                                                                                                                                                                                                                                                                                                                                                                                                                                                                                                                                                                    |
| K <sub>4</sub> Nb <sub>3</sub> Ta <sub>3</sub> Br <sub>18</sub>                                                                  | Water                                                           | [[Nb <sub>3</sub> Ta <sub>3</sub> Br <sup>i</sup> <sub>12</sub> ](H <sub>2</sub> O) <sup>a</sup> <sub>6</sub> ] <sup>2+</sup> (major)<br>[[Nb <sub>4</sub> Ta <sub>2</sub> Br <sup>i</sup> <sub>12</sub> ](H <sub>2</sub> O) <sup>a</sup> <sub>6</sub> ] <sup>2+</sup> (minor)                                                                                                                                          | -                                                                                                                                                                                                                                                                                                                                                                                                                                                                                                                                                                                                                                                                                                                                  |
|                                                                                                                                  | Ethanol                                                         | [Nb <sub>2</sub> Ta <sub>4</sub> Br <sub>12</sub> (H <sub>2</sub> O) <sub>n</sub> (EtOH) <sub>m</sub> ] <sup>2+</sup><br>(minor)                                                                                                                                                                                                                                                                                        | -                                                                                                                                                                                                                                                                                                                                                                                                                                                                                                                                                                                                                                                                                                                                  |
|                                                                                                                                  |                                                                 | [Nb <sub>3</sub> Ta <sub>3</sub> Br <sub>12</sub> (H <sub>2</sub> O) <sub>n</sub> (EtOH) <sub>m</sub> ] <sup>2+</sup><br>(major)                                                                                                                                                                                                                                                                                        |                                                                                                                                                                                                                                                                                                                                                                                                                                                                                                                                                                                                                                                                                                                                    |
| n = 5, 6; m = 0, 1 and n+m = 6                                                                                                   |                                                                 |                                                                                                                                                                                                                                                                                                                                                                                                                         |                                                                                                                                                                                                                                                                                                                                                                                                                                                                                                                                                                                                                                                                                                                                    |
| Acetone                                                                                                                          | -                                                               | [[Nb <sub>3</sub> Ta <sub>3</sub> Br <sup>i</sup> <sub>12</sub> ]Br <sup>a</sup> <sub>6</sub> ] <sup>2-</sup> (minor)<br>[[Nb <sub>2</sub> Ta <sub>4</sub> Br <sup>i</sup> <sub>12</sub> ]Br <sup>a</sup> <sub>6</sub> ] <sup>2-</sup> (major)<br>[[NbTa <sub>5</sub> Br <sup>i</sup> <sub>12</sub> ]Br <sup>a</sup> <sub>6</sub> ] <sup>2-</sup> (minor)                                                               |                                                                                                                                                                                                                                                                                                                                                                                                                                                                                                                                                                                                                                                                                                                                    |
|                                                                                                                                  |                                                                 |                                                                                                                                                                                                                                                                                                                                                                                                                         |                                                                                                                                                                                                                                                                                                                                                                                                                                                                                                                                                                                                                                                                                                                                    |
|                                                                                                                                  |                                                                 |                                                                                                                                                                                                                                                                                                                                                                                                                         |                                                                                                                                                                                                                                                                                                                                                                                                                                                                                                                                                                                                                                                                                                                                    |
| K <sub>4</sub> Nb <sub>2</sub> Ta <sub>4</sub> Br <sub>18</sub>                                                                  | Water                                                           | [[Nb <sub>2</sub> Ta <sub>4</sub> Br <sup>i</sup> <sub>12</sub> ](H <sub>2</sub> O) <sup>a</sup> <sub>6</sub> ] <sup>2+</sup> (major)<br>[[Nb <sub>3</sub> Ta <sub>3</sub> Br <sup>i</sup> <sub>12</sub> ](H <sub>2</sub> O) <sup>a</sup> <sub>6</sub> ] <sup>2+</sup> (major)<br>[[Nb <sub>4</sub> Ta <sub>2</sub> Br <sup>i</sup> <sub>12</sub> ](H <sub>2</sub> O) <sup>a</sup> <sub>6</sub> ] <sup>2+</sup> (minor) | -                                                                                                                                                                                                                                                                                                                                                                                                                                                                                                                                                                                                                                                                                                                                  |
|                                                                                                                                  | Ethanol                                                         | [Nb <sub>3</sub> Ta <sub>3</sub> Br <sub>12</sub> (H <sub>2</sub> O) <sub>n</sub> (EtOH) <sub>m</sub> ] <sup>2+</sup><br>(major)                                                                                                                                                                                                                                                                                        | -                                                                                                                                                                                                                                                                                                                                                                                                                                                                                                                                                                                                                                                                                                                                  |
|                                                                                                                                  |                                                                 | [Nb <sub>2</sub> Ta <sub>4</sub> Br <sub>12</sub> (H <sub>2</sub> O) <sub>n</sub> (EtOH) <sub>m</sub> ] <sup>2+</sup><br>(major)                                                                                                                                                                                                                                                                                        |                                                                                                                                                                                                                                                                                                                                                                                                                                                                                                                                                                                                                                                                                                                                    |
| n = 5, 6; m = 0, 1 and n+m = 6                                                                                                   |                                                                 |                                                                                                                                                                                                                                                                                                                                                                                                                         |                                                                                                                                                                                                                                                                                                                                                                                                                                                                                                                                                                                                                                                                                                                                    |
| Acetone                                                                                                                          | -                                                               | [[Nb <sub>2</sub> Ta <sub>4</sub> Br <sup>i</sup> <sub>12</sub> ]Br <sup>a</sup> <sub>6</sub> ] <sup>2-</sup> (major)<br>[[NbTa <sub>5</sub> Br <sup>i</sup> <sub>12</sub> ]Br <sup>a</sup> <sub>6</sub> ] <sup>2-</sup> (minor)                                                                                                                                                                                        |                                                                                                                                                                                                                                                                                                                                                                                                                                                                                                                                                                                                                                                                                                                                    |
|                                                                                                                                  |                                                                 |                                                                                                                                                                                                                                                                                                                                                                                                                         |                                                                                                                                                                                                                                                                                                                                                                                                                                                                                                                                                                                                                                                                                                                                    |
|                                                                                                                                  |                                                                 |                                                                                                                                                                                                                                                                                                                                                                                                                         |                                                                                                                                                                                                                                                                                                                                                                                                                                                                                                                                                                                                                                                                                                                                    |
| K <sub>4</sub> NbTa <sub>5</sub> Br <sub>18</sub>                                                                                | Water                                                           | [[NbTa <sub>5</sub> Br <sup>i</sup> <sub>12</sub> ](H <sub>2</sub> O) <sup>a</sup> <sub>6</sub> ] <sup>2+</sup> (major)<br>[[Nb <sub>2</sub> Ta <sub>4</sub> Br <sup>i</sup> <sub>12</sub> ](H <sub>2</sub> O) <sup>a</sup> <sub>6</sub> ] <sup>2+</sup> (major)                                                                                                                                                        | -                                                                                                                                                                                                                                                                                                                                                                                                                                                                                                                                                                                                                                                                                                                                  |

|         |   |                                                                                               |                                                                      |
|---------|---|-----------------------------------------------------------------------------------------------|----------------------------------------------------------------------|
|         |   | $[\{\text{Nb}_3\text{Ta}_3\text{Br}_{12}\}(\text{H}_2\text{O})_6]^{2+}$ (minor)               |                                                                      |
|         |   | $[\text{Nb}_2\text{Ta}_4\text{Br}_{12}(\text{H}_2\text{O})_n(\text{EtOH})_m]^{2+}$<br>(major) |                                                                      |
| Ethanol |   | $[\text{NbTa}_5\text{Br}_{12}(\text{H}_2\text{O})_n(\text{EtOH})_m]^{2+}$<br>(minor)          | -                                                                    |
|         |   | $n = 5, 6; m = 0, 1$ and $n+m = 6$                                                            |                                                                      |
|         |   |                                                                                               | $[\{\text{NbTa}_5\text{Br}_{12}\}\text{Br}_6]^{2-}$ (major)          |
| Acetone | - |                                                                                               | $[\{\text{Ta}_6\text{Br}_{12}\}\text{Br}_6]^{2-}$ (minor)            |
|         |   |                                                                                               | $[\{\text{Nb}_2\text{Ta}_4\text{Br}_{12}\}\text{Br}_6]^{2-}$ (minor) |

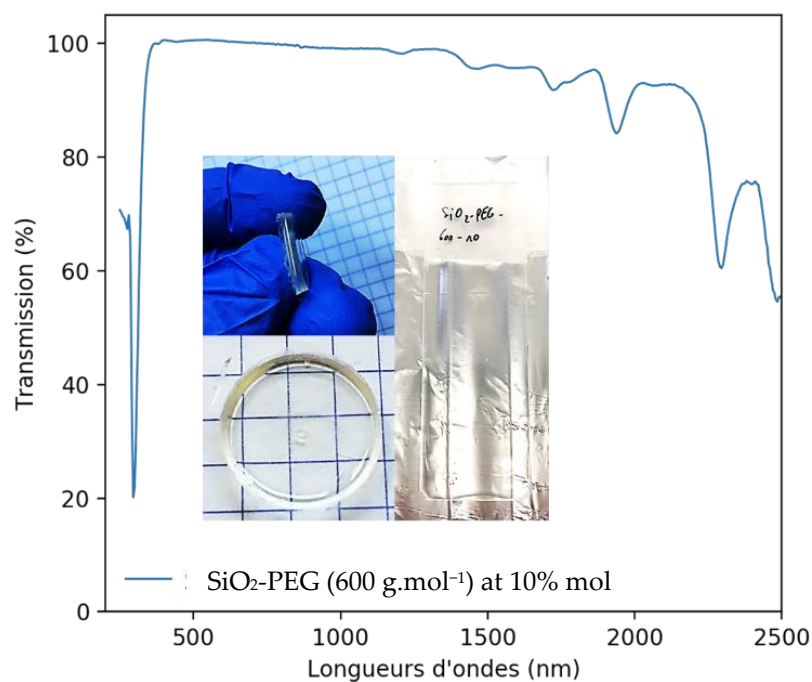

**Figure S4.** Camera image of SiO<sub>2</sub>-PEG bulk matrix and thin film. UV-Vis-NIR transmission spectra of the @SiO<sub>2</sub>-PEG thin film.

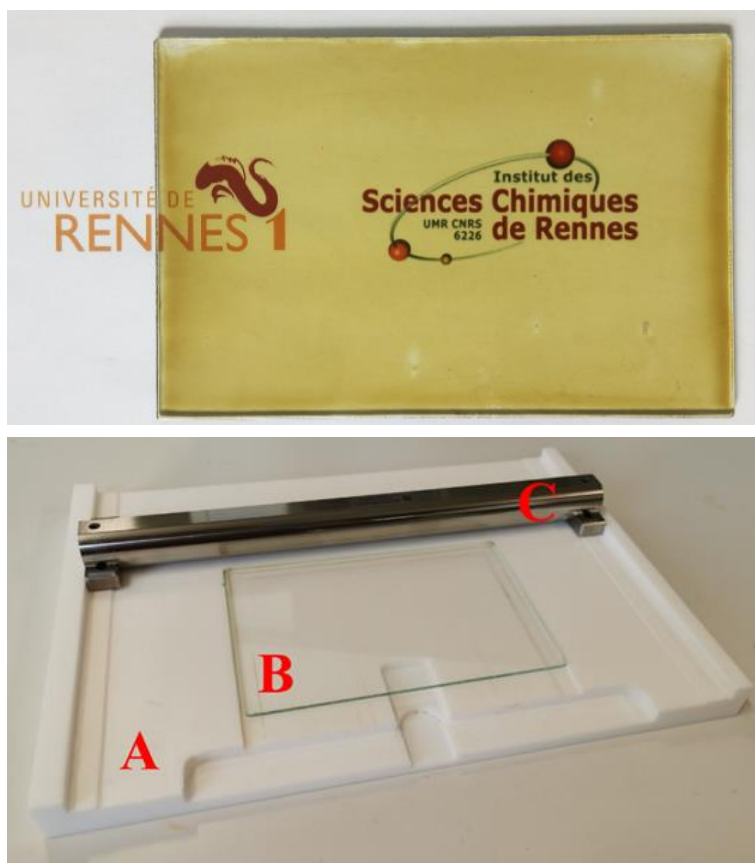

**Figure S5.** Camera image of the homemade upgraded Mayer bar coater (left) and  $\{\text{Nb}_6\text{Cl}_{12}\}@\text{SiO}_2\text{-PEG}$  thin film deposited on  $10\text{ cm} \times 15\text{ cm}$  glass substrate by Mayer bar coater (right). Teflon sample holder (A) ( $30\text{ cm} \times 25\text{ cm} \times 2\text{ cm}$ ), glass substrate (B) (max:  $15\text{ cm} \times 10\text{ cm} \times 0.2\text{ cm}$ ) et bare-coater (C).

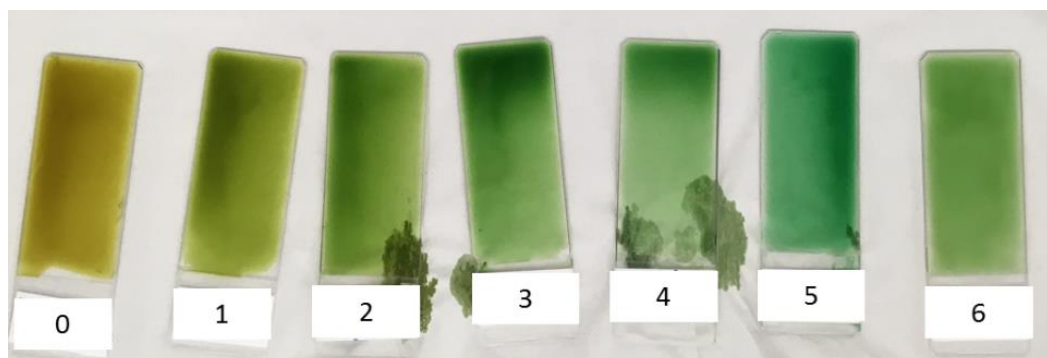

**Figure S6.** Camera images of the  $\{\text{Nb}_{6-x}\text{Ta.Bri}_{12}\}@\text{SiO}_2\text{-PEG}$  nanocomposites thin films.



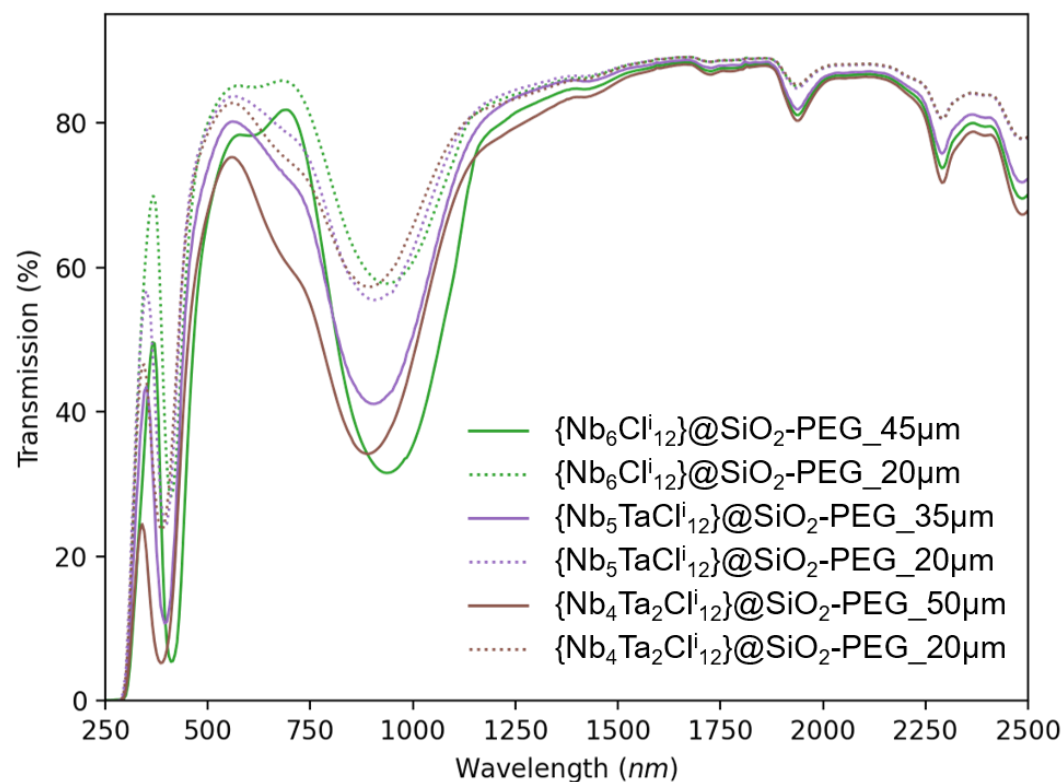

**Figure S7.** UV-Visible-NIR transmission spectra of the films based on the  $\{Nb_{6-x}Ta_xCl_{12}\}^{2+}$  cluster cores ( $0 \leq x \leq 2$ ; VEC = 16) with different thickness.

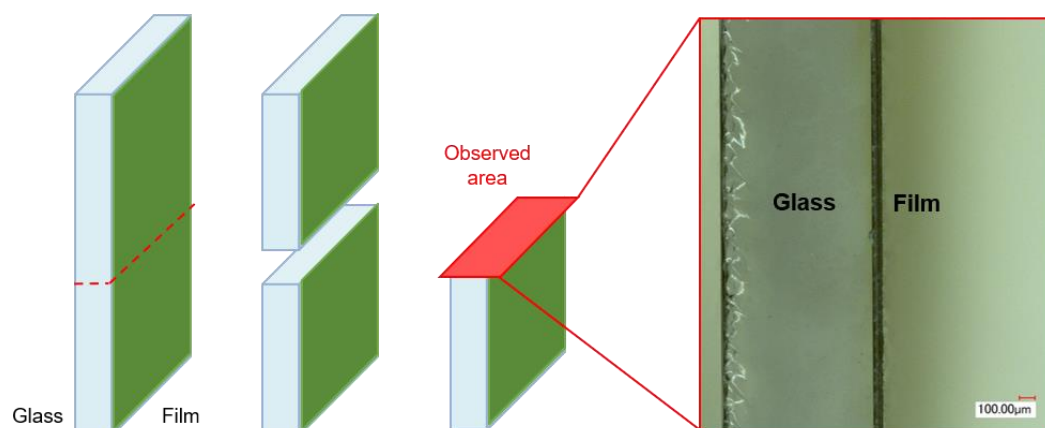

**Figure S8.** Sketch and digital microscope image of the cross section of a  $\{Nb_6Cl_{12}\}@SiO_2$ -PEG nano-composite film deposited on glass substrate.

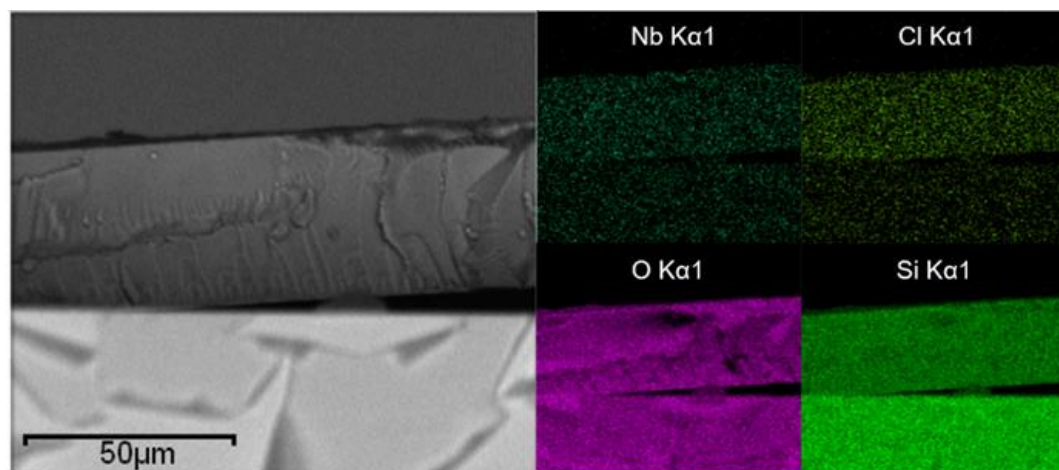

**Figure S9.** SEM image and EDX analysis of the  $\{Nb_6Cl_{12}\}@SiO_2$ -PEG nanocomposite film deposited on glass substrate.

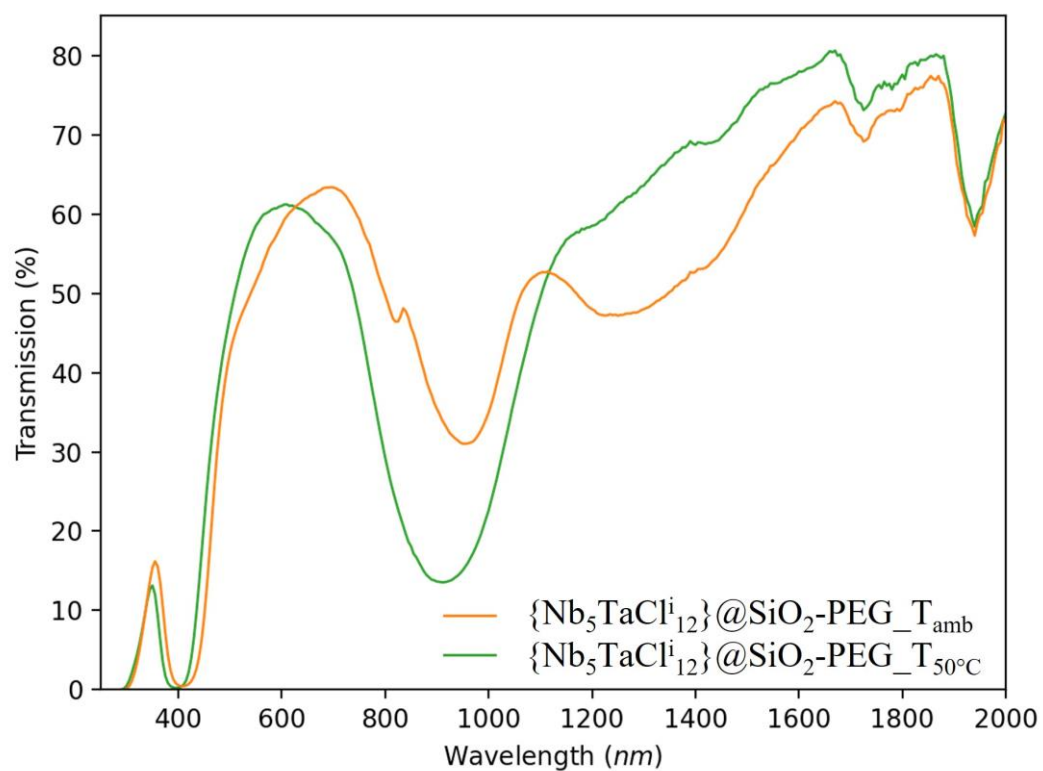

**Figure S10.** UV-Vis-NIR transmission spectra of the  $\{Nb_5TaCl_{12}\}@SiO_2$ -PEG nanocomposite films before and after annealed at 50°C/100h.

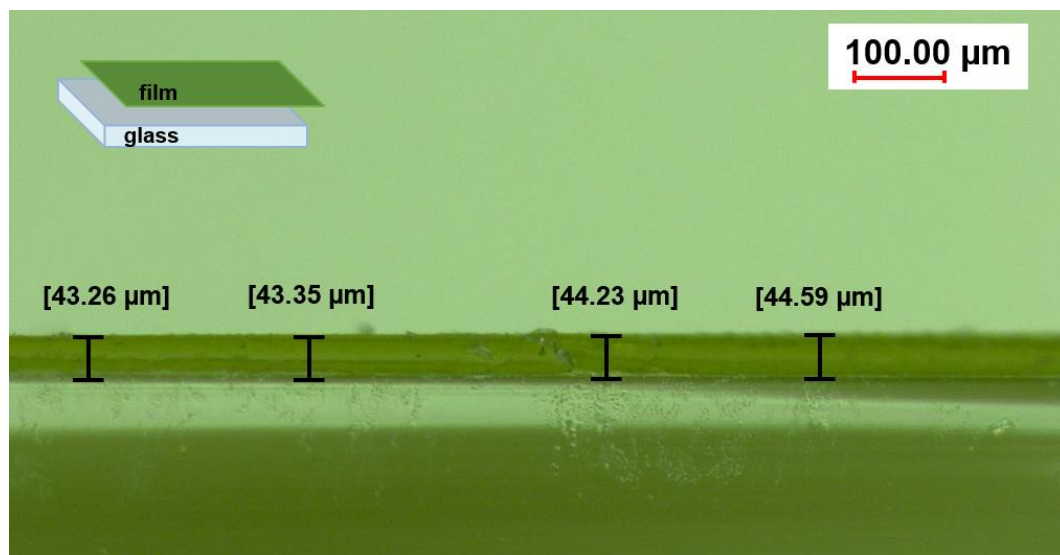

**Figure S11.** Example of digital microscope pictures of the cross section of a  $\{Nb_5TaBr_{12}\}-2@PVP$  nanocomposite films on glass substrate.

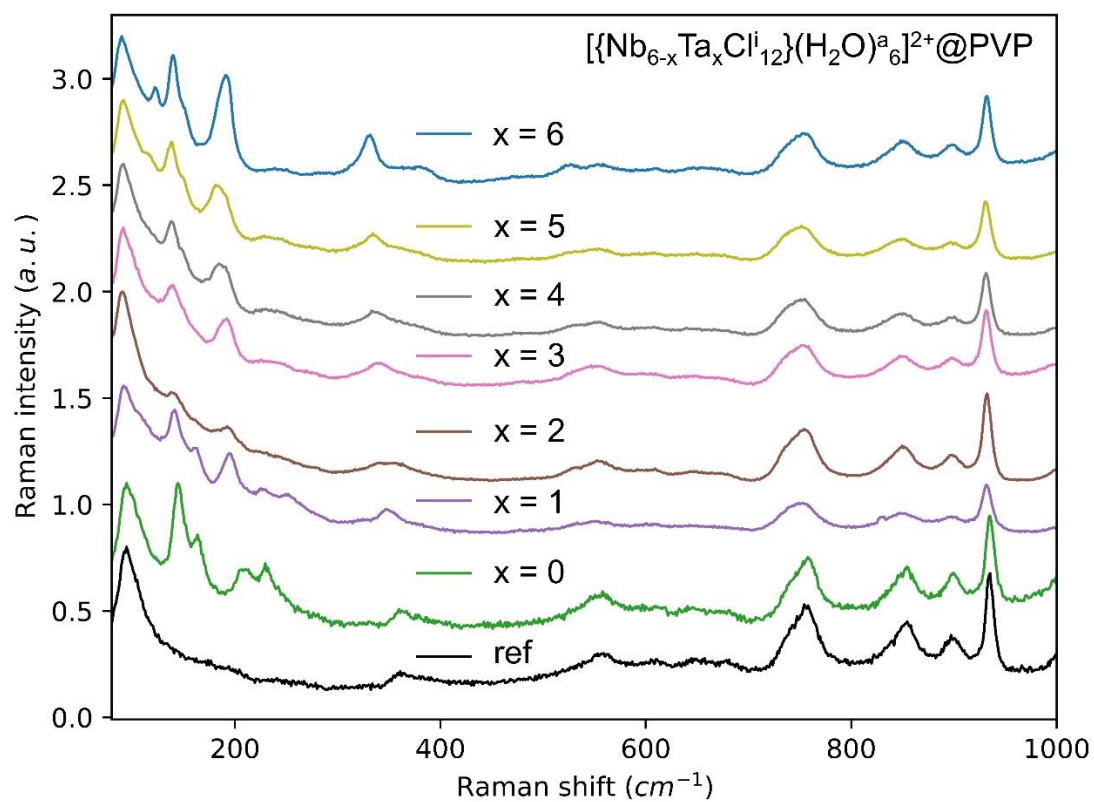

**Figure S12.** Normalized Raman spectra of the  $\{Nb_{6-x}Ta_xCl_{12}\}-12@PVP$  nanocomposite films ( $1 \leq x \leq 5$ ). Ref = @PVP film without metal atom clusters.

**Table S3.** Main Raman signature of the  $\{\text{Nb}_{6-x}\text{Ta}_x\text{Cl}_{12}\}$ -12@PVP nanocomposite films ( $0 \leq x \leq 6$ ). The  $\{\text{Nb}_6\text{Cl}_{12}\}$ @PVP Raman signature ( $x = 0$ ) was reported very recently in Ref 1.

| <b><math>\{\text{Nb}_{6-x}\text{Ta}_x\text{Cl}_{12}\}</math>@PVP</b> |     |           |     |     |     |     |
|----------------------------------------------------------------------|-----|-----------|-----|-----|-----|-----|
| $x = 0$ [1]                                                          | 360 | 232 – 213 | –   | 164 | 144 | –   |
| $x = 1$                                                              | 347 | 250 – 227 | 195 | 161 | 142 | –   |
| $x = 2$                                                              | 343 | –         | 192 | 160 | 138 | –   |
| $x = 3$                                                              | 338 | –         | 192 | –   | 139 | –   |
| $x = 4$                                                              | 333 | –         | 184 | –   | 138 | –   |
| $x = 5$                                                              | 334 | –         | 181 | –   | 138 | 119 |
| $x = 6$                                                              | 330 | –         | 188 | –   | 138 | 122 |

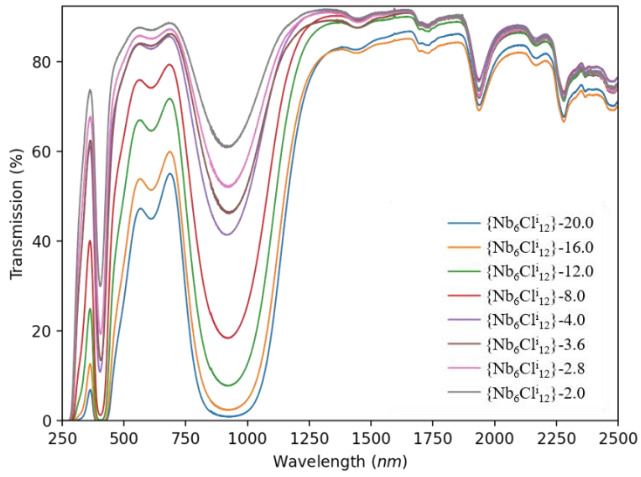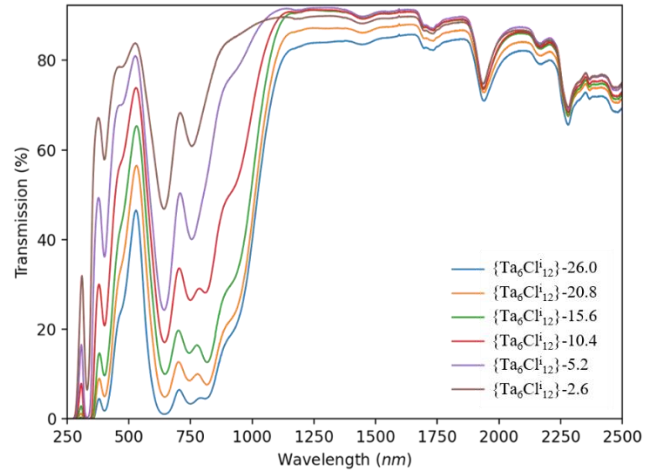

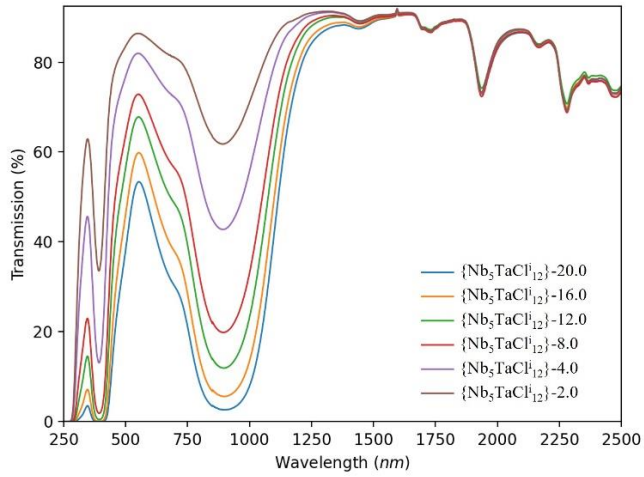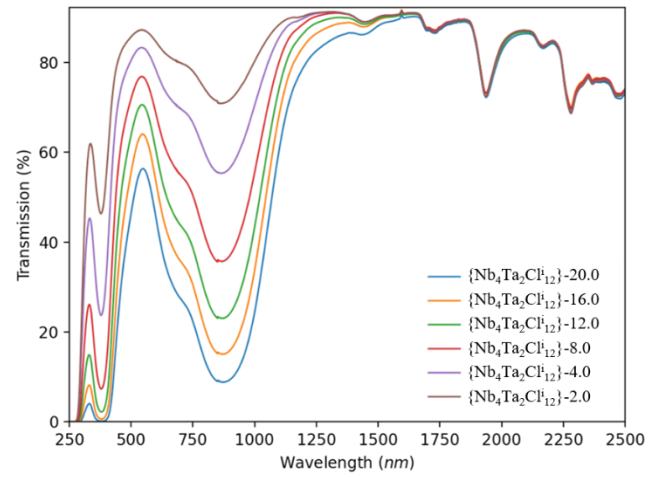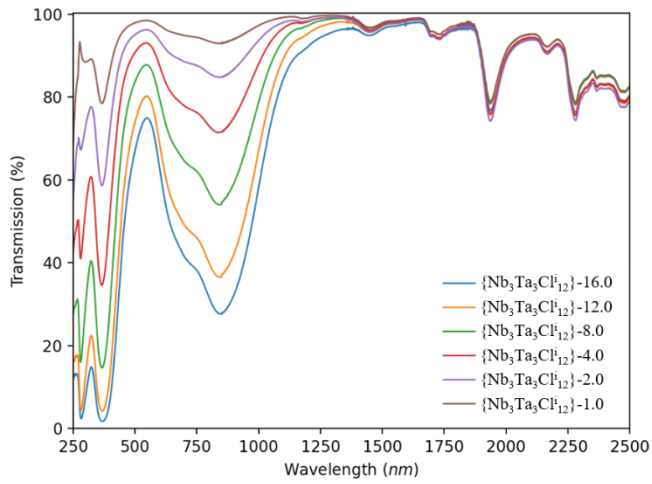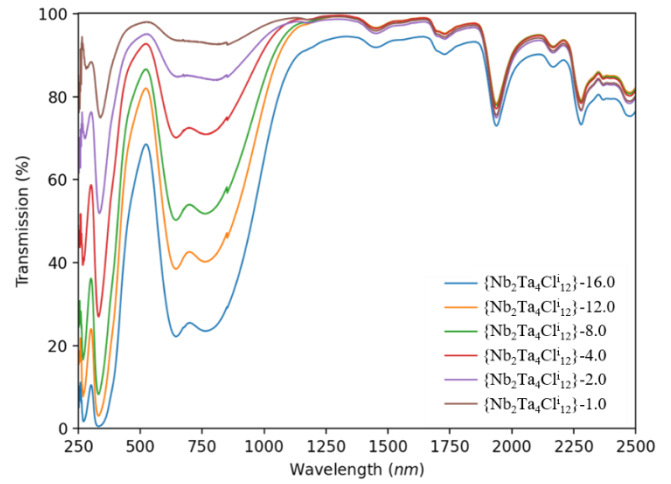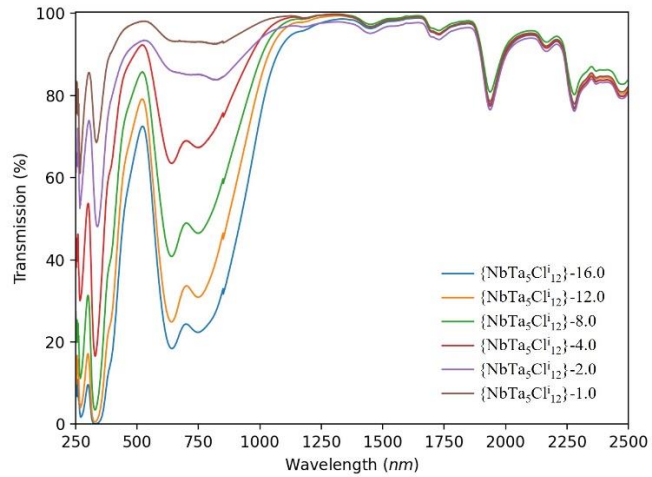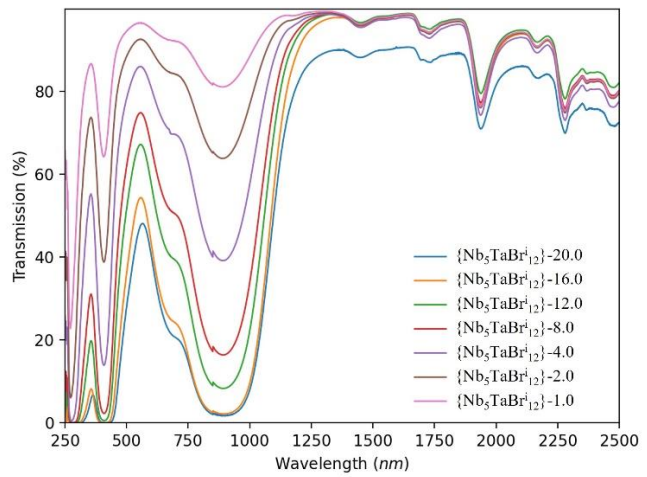



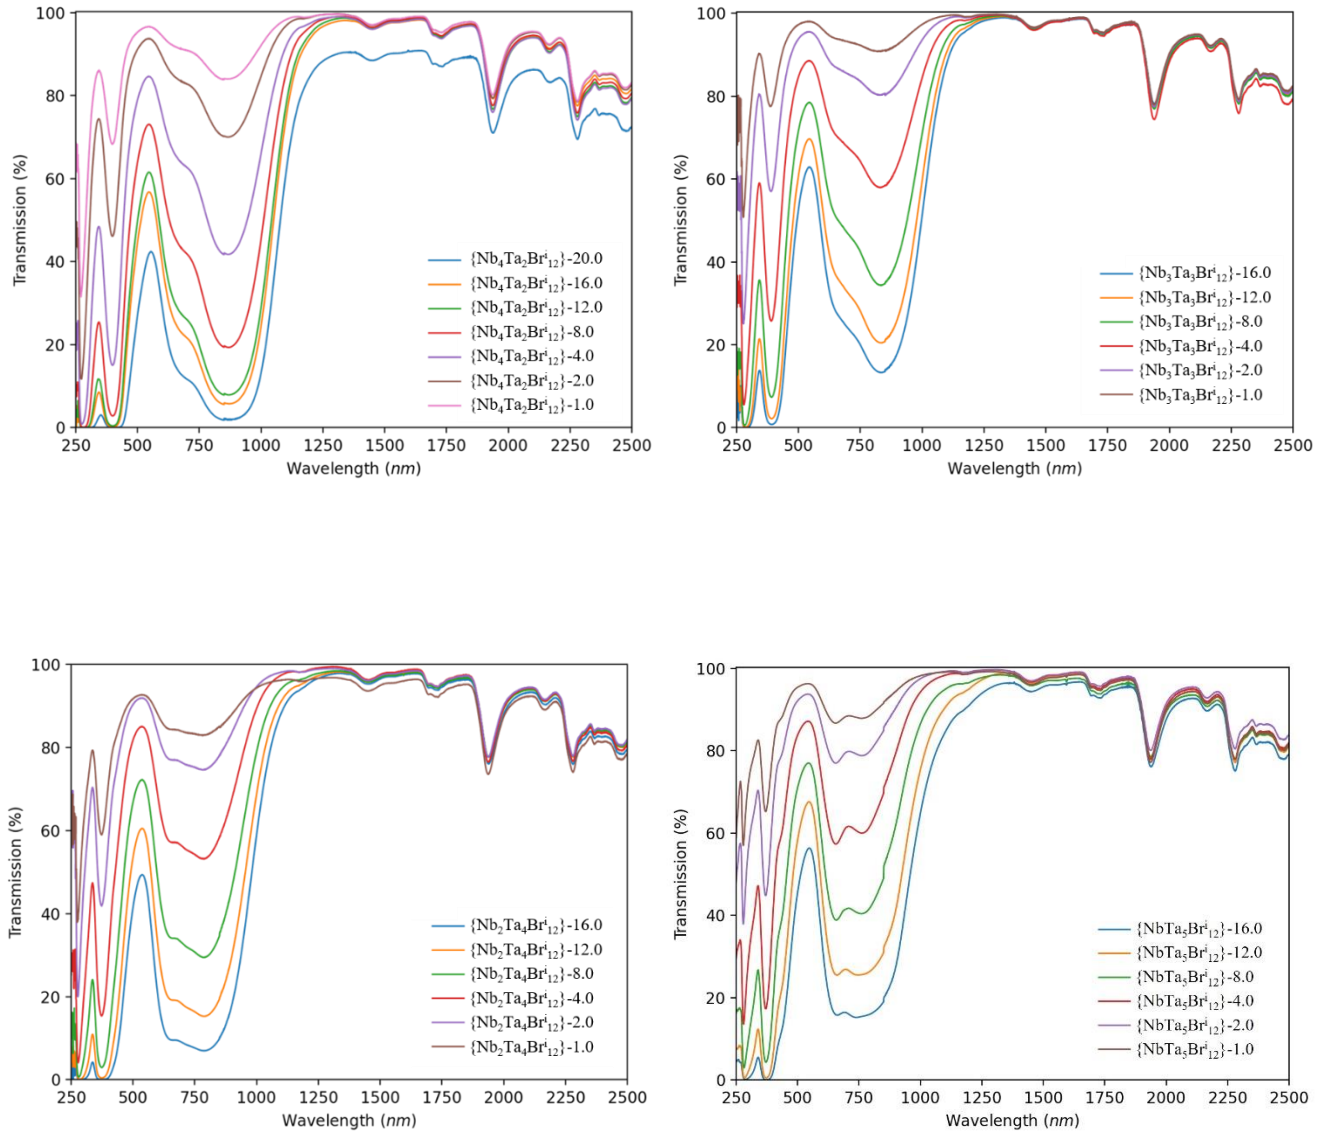

**Figure S13.** UV-Vis-NIR transmission spectra of the {Nb<sub>6-x</sub>Ta<sub>x</sub>Br<sub>12</sub><sup>i</sup>}-Y@PVP (X = Cl, Br; 0 ≤ x ≤ 6) nanocomposite films for concentrations ranging from 1 to 20 g·L<sup>-1</sup>.

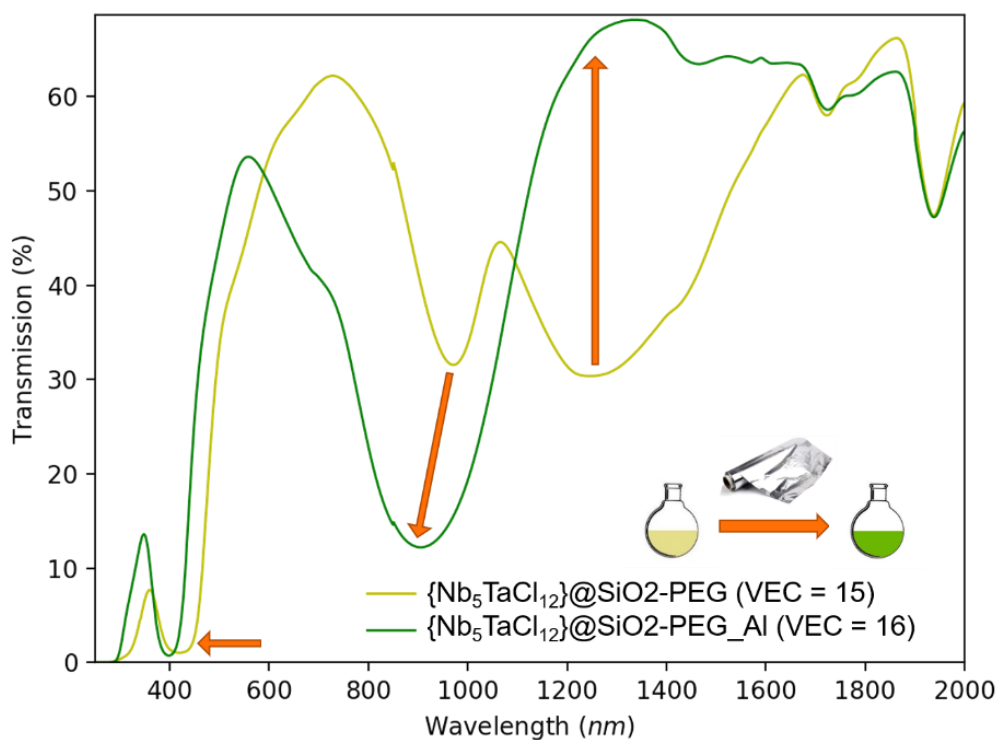

**Figure S14.** UV-Vis-NIR transmission spectra of the  $\{Nb_5TaCl_{12}\}@SiO_2-PEG$  nanocomposite films without and with aluminum metal as reducing agent.

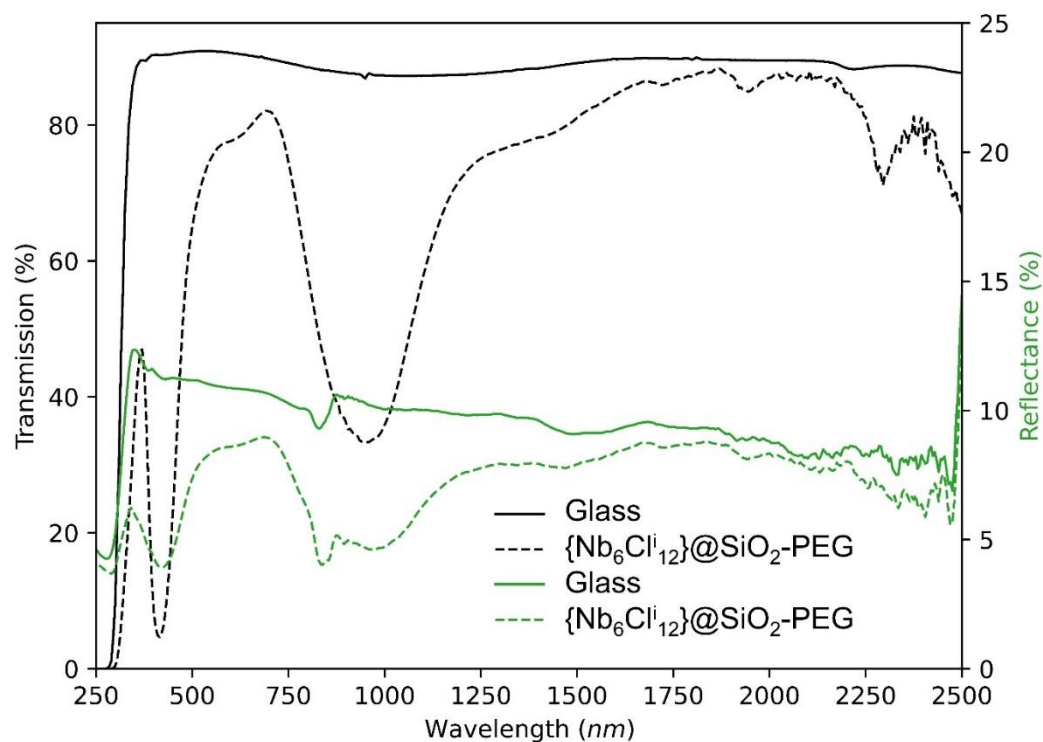

**Figure S15.** UV-Vis-NIR transmission and reflectance spectra of the glass substrate and the  $\{Nb_6Cl_{12}\}@SiO_2-PEG$  nanocomposite films.

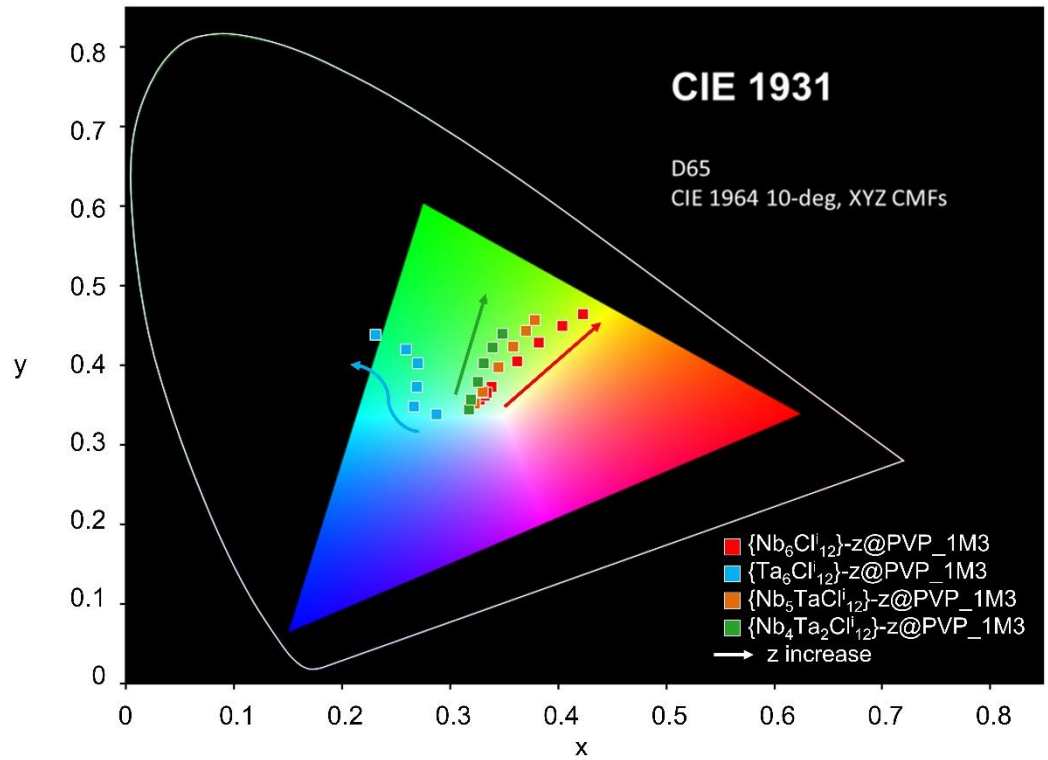

**Figure S16.** CIE chromaticity coordinates for the nanocomposite films based on chlorine cluster compounds with  $x = 0, 1, 2$  and  $6$ .

Figure-of-merit (FOM) values based on CIE Colorimetric coordinates,  $T_L$  (visible transmittance),  $T_E$  (solar transmittance),  $S_{NIR}$  (NIR shielding), haze and clarity were measured.  $T_L$ ,  $T_E$  and  $S_{NIR}$  were obtained using the equations 1, 2 and 3 respectively [2,3].

$$T_L = \frac{\int_{380}^{760} T(\lambda)S(\lambda)Y(\lambda)d\lambda}{\int_{380}^{760} S(\lambda)Y(\lambda)d\lambda} \quad \text{Equation S1}$$

$$T_E = \frac{\int_{300}^{2500} T(\lambda)S(\lambda) d\lambda}{\int_{300}^{2500} S(\lambda) d\lambda} \quad \text{Equation S2}$$

$$S_{NIR} = 100 - \frac{\int_{760}^{2500} T(\lambda)S(\lambda) d\lambda}{\int_{760}^{2500} S(\lambda) d\lambda} \quad \text{Equation S3}$$

$T_E$  is the integrated spectral transmittance of a window weighted by the normalized solar energy distribution spectrum,  $S$ .  $S$  represents the Air Mass 1.5 which is equivalent to the spectrum of solar radiation after passing through 1.5 times the perpendicular atmospheric thickness.  $T_L$  is calculated similarly, but weighted by the photopic response of the human eye,  $Y$ .

The color coordinates  $(x, y, z)$  thanks to the procedure defined by the International Commission on Illumination (CIE 1931). [4–8] Thus, we used the CIE standard illuminant D65, corresponding roughly to the average midday light in Western Europe / Northern Europe and the standard colorimetric observer for the  $10^\circ$  field obtained from the combined measurements of Stiles and Speranskaya.

The spectral transmittance spectrum of the sample  $T(\lambda)$  is multiplied by the spectral power distribution of a reference illuminant  $I(\lambda)$  giving the following equations:

$$X = \frac{1}{N} \int \bar{x}(\lambda) \times T(\lambda) \times I(\lambda) d\lambda \quad \text{Equation S4}$$

$$Y = \frac{1}{N} \int \bar{y}(\lambda) \times T(\lambda) \times I(\lambda) d\lambda \quad \text{Equation S5}$$

$$Z = \frac{1}{N} \int \bar{z}(\lambda) \times T(\lambda) \times I(\lambda) d\lambda \quad \text{Equation S6}$$

$$N = \int \bar{y}(\lambda) \times I(\lambda) d\lambda \quad \text{Equation S7}$$



Where  $\bar{x}$ ,  $\bar{y}$  and  $\bar{z}$  are the CIE standard observer functions (10 degrees). The integrals are computed over the visible spectrum (from 360 nm to 830 nm). We used the common reference D65. In practice, the functions found in these integrals exist either from empirical experiments or by measurement. Therefore, there are not mathematical equations representing them. Instead, they exist as discrete samples and so the integrals are replaced by summations:

$$X = \frac{1}{N} \sum_i \bar{x}_i \times S_i \times I_i \quad \text{Equation S8}$$

$$Y = \frac{1}{N} \sum_i \bar{y}_i \times S_i \times I_i \quad \text{Equation S9}$$

$$Z = \frac{1}{N} \sum_i \bar{z}_i \times S_i \times I_i \quad \text{Equation S10}$$

$$N = \sum_i \bar{y}_i \times I_i \quad \text{Equation S11}$$

Then, given a XYZ colour whose components are in the nominal range [0,1]:

$$x = \frac{X}{X+Y+Z} \quad \text{Equation S12}$$

$$y = \frac{Y}{X+Y+Z} \quad \text{Equation S13}$$

$$z = \frac{Z}{X+Y+Z} \quad \text{Equation S14}$$

The  $L^*$   $a^*$   $b^*$  coordinates were obtained by using this conversion equation:

$$L^* = 116 f \left( \frac{Y}{Y_n} \right) - 16 \quad \text{Equation S15}$$

$$a^* = 500 \left( f \left( \frac{X}{X_n} \right) - f \left( \frac{Y}{Y_n} \right) \right) \quad \text{Equation S16}$$

$$b^* = 200 \left( f \left( \frac{Y}{Y_n} \right) - f \left( \frac{Z}{Z_n} \right) \right) \quad \text{Equation S17}$$

**Table S4.** FOM for all the SiO<sub>2</sub>-PEG films with VEC = 16.

| Cluster core - concentration                                                                  | T <sub>vis</sub> | T <sub>sol</sub> | T <sub>vis</sub> /T <sub>sol</sub> | S <sub>NIR</sub> |
|-----------------------------------------------------------------------------------------------|------------------|------------------|------------------------------------|------------------|
| {Nb <sub>6</sub> Cl <sub>12</sub> } <sup>2+</sup> @SiO <sub>2</sub> -PEG-45μm                 | 74.8             | 62.1             | 1.20                               | 39.7             |
| {Nb <sub>6</sub> Cl <sub>12</sub> } <sup>2+</sup> @SiO <sub>2</sub> -PEG-20μm                 | 83.5             | 74.9             | 1.11                               | 26.1             |
| {Nb <sub>5</sub> TaCl <sub>12</sub> } <sup>2+</sup> @SiO <sub>2</sub> -PEG-35μm               | 77.8             | 65.7             | 1.19                               | 34.2             |
| {Nb <sub>5</sub> TaCl <sub>12</sub> } <sup>2+</sup> @SiO <sub>2</sub> -PEG-20μm               | 82.1             | 72.8             | 1.13                               | 27.1             |
| {Nb <sub>4</sub> Ta <sub>2</sub> Cl <sub>12</sub> } <sup>2+</sup> @SiO <sub>2</sub> -PEG-50μm | 72.0             | 58.9             | 1.22                               | 38.6             |
| {Nb <sub>4</sub> Ta <sub>2</sub> Cl <sub>12</sub> } <sup>2+</sup> @SiO <sub>2</sub> -PEG-20μm | 80.9             | 71.9             | 1.12                               | 26.5             |

**Table S5.** FOM for all the PVP films with VEC = 16.

| Cluster core - concentration             | T <sub>vis</sub> | T <sub>sol</sub> | T <sub>vis</sub> /T <sub>sol</sub> | S <sub>NIR</sub> |
|------------------------------------------|------------------|------------------|------------------------------------|------------------|
| {Nb <sub>6</sub> Cl <sub>12</sub> }-20.0 | 41.5             | 33.8             | 1.23                               | 63.9             |
| {Nb <sub>6</sub> Cl <sub>12</sub> }-16.0 | 48.6             | 35.0             | 1.28                               | 61.7             |
| {Nb <sub>6</sub> Cl <sub>12</sub> }-12.0 | 62.2             | 48.3             | 1.29                               | 53.7             |
| {Nb <sub>6</sub> Cl <sub>12</sub> }-8.0  | 72.3             | 57.9             | 1.25                               | 45.1             |
| {Nb <sub>6</sub> Cl <sub>12</sub> }-4.0  | 81.9             | 70.6             | 1.16                               | 31.8             |
| {Nb <sub>6</sub> Cl <sub>12</sub> }-3.6  | 82.0             | 71.5             | 1.15                               | 30.1             |
| {Nb <sub>6</sub> Cl <sub>12</sub> }-2.8  | 84.1             | 74.8             | 1.12                               | 26.9             |
| {Nb <sub>6</sub> Cl <sub>12</sub> }-2.0  | 86.4             | 78.8             | 1.10                               | 22.6             |
| {Ta <sub>6</sub> Cl <sub>12</sub> }-26.0 | 26.3             | 30.5             | 0.86                               | 48.0             |
| {Ta <sub>6</sub> Cl <sub>12</sub> }-20.8 | 37.4             | 36.4             | 1.03                               | 44.5             |
| {Ta <sub>6</sub> Cl <sub>12</sub> }-15.6 | 46.6             | 42.9             | 1.09                               | 39.3             |
| {Ta <sub>6</sub> Cl <sub>12</sub> }-10.4 | 55.6             | 52.7             | 1.05                               | 30.7             |
| {Ta <sub>6</sub> Cl <sub>12</sub> }-5.2  | 62.9             | 63.8             | 0.98                               | 19.7             |
| {Ta <sub>6</sub> Cl <sub>12</sub> }-2.6  | 73.2             | 74.2             | 0.99                               | 15.5             |

|                                                          |      |      |      |      |
|----------------------------------------------------------|------|------|------|------|
| {Nb <sub>5</sub> TaCl <sub>12</sub> }-20.0               | 47.1 | 35.6 | 1.32 | 57.8 |
| {Nb <sub>5</sub> TaCl <sub>12</sub> }-16.0               | 54.1 | 40.7 | 1.33 | 54.4 |
| {Nb <sub>5</sub> TaCl <sub>12</sub> }-12.0               | 62.9 | 48.3 | 1.30 | 48.8 |
| {Nb <sub>5</sub> TaCl <sub>12</sub> }-8.0                | 68.8 | 54.5 | 1.26 | 43.7 |
| {Nb <sub>5</sub> TaCl <sub>12</sub> }-4.0                | 79.6 | 68.3 | 1.16 | 31.1 |
| {Nb <sub>5</sub> TaCl <sub>12</sub> }-2.0                | 85.1 | 77.6 | 1.10 | 22.2 |
|                                                          |      |      |      |      |
| {Nb <sub>4</sub> Ta <sub>2</sub> Cl <sub>12</sub> }-20.0 | 50.0 | 39.5 | 1.26 | 51.5 |
| {Nb <sub>4</sub> Ta <sub>2</sub> Cl <sub>12</sub> }-16.0 | 58.1 | 46.2 | 1.26 | 46.2 |
| {Nb <sub>4</sub> Ta <sub>2</sub> Cl <sub>12</sub> }-12.0 | 65.1 | 52.7 | 1.23 | 41.1 |
| {Nb <sub>4</sub> Ta <sub>2</sub> Cl <sub>12</sub> }-8.0  | 72.5 | 61.1 | 1.19 | 34.1 |
| {Nb <sub>4</sub> Ta <sub>2</sub> Cl <sub>12</sub> }-4.0  | 80.7 | 72.3 | 1.12 | 24.8 |
| {Nb <sub>4</sub> Ta <sub>2</sub> Cl <sub>12</sub> }-2.0  | 85.8 | 80.5 | 1.07 | 18.1 |
|                                                          |      |      |      |      |
| {Nb <sub>3</sub> Ta <sub>3</sub> Cl <sub>12</sub> }-16.0 | 61.5 | 50.8 | 1.21 | 40.2 |
| {Nb <sub>3</sub> Ta <sub>3</sub> Cl <sub>12</sub> }-12.0 | 67.4 | 57.0 | 1.18 | 34.8 |
| {Nb <sub>3</sub> Ta <sub>3</sub> Cl <sub>12</sub> }-8.0  | 76.6 | 67.7 | 1.13 | 26.4 |
| {Nb <sub>3</sub> Ta <sub>3</sub> Cl <sub>12</sub> }-4.0  | 83.4 | 76.9 | 1.08 | 19.5 |
| {Nb <sub>3</sub> Ta <sub>3</sub> Cl <sub>12</sub> }-2.0  | 87.9 | 84.0 | 1.05 | 14.5 |
| {Nb <sub>3</sub> Ta <sub>3</sub> Cl <sub>12</sub> }-1.0  | 90.9 | 88.7 | 1.02 | 10.9 |
|                                                          |      |      |      |      |
| {Nb <sub>2</sub> Ta <sub>4</sub> Cl <sub>12</sub> }-16.0 | 45.2 | 43.5 | 1.04 | 39.9 |
| {Nb <sub>2</sub> Ta <sub>4</sub> Cl <sub>12</sub> }-12.0 | 60.6 | 57.1 | 1.06 | 29.3 |
| {Nb <sub>2</sub> Ta <sub>4</sub> Cl <sub>12</sub> }-8.0  | 67.9 | 64.3 | 1.06 | 24.8 |
| {Nb <sub>2</sub> Ta <sub>4</sub> Cl <sub>12</sub> }-4.0  | 78.8 | 75.6 | 1.04 | 17.9 |
| {Nb <sub>2</sub> Ta <sub>4</sub> Cl <sub>12</sub> }-2.0  | 85.1 | 82.6 | 1.03 | 14.7 |
| {Nb <sub>2</sub> Ta <sub>4</sub> Cl <sub>12</sub> }-1.0  | 89.7 | 87.9 | 1.02 | 11.4 |
|                                                          |      |      |      |      |
| {NbTa <sub>5</sub> Cl <sub>12</sub> }-16.0               | 45.6 | 45.5 | 1.00 | 34.8 |
| {NbTa <sub>5</sub> Cl <sub>12</sub> }-12.0               | 52.6 | 52.7 | 1.00 | 28.6 |
| {NbTa <sub>5</sub> Cl <sub>12</sub> }-8.0                | 63.7 | 62.4 | 1.02 | 23.1 |
| {NbTa <sub>5</sub> Cl <sub>12</sub> }-4.0                | 76.3 | 74.2 | 1.03 | 17.3 |
| {NbTa <sub>5</sub> Cl <sub>12</sub> }-2.0                | 84.3 | 82.1 | 1.03 | 15.0 |
| {NbTa <sub>5</sub> Cl <sub>12</sub> }-1.0                | 89.7 | 88.1 | 1.02 | 10.9 |
|                                                          |      |      |      |      |
| {Nb <sub>5</sub> TaBr <sub>12</sub> }-20.0               | 32.7 | 26.1 | 1.25 | 63.7 |
| {Nb <sub>5</sub> TaBr <sub>12</sub> }-16.0               | 38.7 | 30.3 | 1.28 | 59.6 |
| {Nb <sub>5</sub> TaBr <sub>12</sub> }-12.0               | 52.7 | 40.4 | 1.30 | 53.1 |
| {Nb <sub>5</sub> TaBr <sub>12</sub> }-8.0                | 61.4 | 48.1 | 1.28 | 47.6 |
| {Nb <sub>5</sub> TaBr <sub>12</sub> }-4.0                | 75.0 | 62.9 | 1.19 | 32.5 |
| {Nb <sub>5</sub> TaBr <sub>12</sub> }-2.0                | 83.5 | 75.5 | 1.10 | 23.8 |
| {Nb <sub>5</sub> TaBr <sub>12</sub> }-1.0                | 88.4 | 83.8 | 1.05 | 16.3 |
|                                                          |      |      |      |      |
| {Nb <sub>4</sub> Ta <sub>2</sub> Br <sub>12</sub> }-20.0 | 27.0 | 23.5 | 1.15 | 53.9 |
| {Nb <sub>4</sub> Ta <sub>2</sub> Br <sub>12</sub> }-16.0 | 40.6 | 33.3 | 1.22 | 52.0 |
| {Nb <sub>4</sub> Ta <sub>2</sub> Br <sub>12</sub> }-12.0 | 45.5 | 36.5 | 1.24 | 44.3 |
| {Nb <sub>4</sub> Ta <sub>2</sub> Br <sub>12</sub> }-8.0  | 58.6 | 47.5 | 1.23 | 33.1 |
| {Nb <sub>4</sub> Ta <sub>2</sub> Br <sub>12</sub> }-4.0  | 72.7 | 62.1 | 1.17 | 20.2 |
| {Nb <sub>4</sub> Ta <sub>2</sub> Br <sub>12</sub> }-2.0  | 84.4 | 77.8 | 1.08 | 14.6 |
|                                                          |      |      |      |      |
| {Nb <sub>3</sub> Ta <sub>3</sub> Br <sub>12</sub> }-16.0 | 46.3 | 39.4 | 1.17 | 45.0 |

|                                                          |      |      |      |      |
|----------------------------------------------------------|------|------|------|------|
| {Nb <sub>3</sub> Ta <sub>3</sub> Br <sub>12</sub> }-12.0 | 53.9 | 45.6 | 1.18 | 40.8 |
| {Nb <sub>3</sub> Ta <sub>3</sub> Br <sub>12</sub> }-8.0  | 64.4 | 55.3 | 1.16 | 34.0 |
| {Nb <sub>3</sub> Ta <sub>3</sub> Br <sub>12</sub> }-4.0  | 77.1 | 69.4 | 1.11 | 24.1 |
| {Nb <sub>3</sub> Ta <sub>3</sub> Br <sub>12</sub> }-2.0  | 86.5 | 81.9 | 1.05 | 15.4 |
| {Nb <sub>3</sub> Ta <sub>3</sub> Br <sub>12</sub> }-1.0  | 90.0 | 87.5 | 1.03 | 11.5 |
|                                                          |      |      |      |      |
| {Nb <sub>2</sub> Ta <sub>4</sub> Br <sub>12</sub> }-16.0 | 29.9 | 30.6 | 0.98 | 45.4 |
| {Nb <sub>2</sub> Ta <sub>4</sub> Br <sub>12</sub> }-12.0 | 41.6 | 39.1 | 1.06 | 40.0 |
| {Nb <sub>2</sub> Ta <sub>4</sub> Br <sub>12</sub> }-8.0  | 55.0 | 55.0 | 1.10 | 33.0 |
| {Nb <sub>2</sub> Ta <sub>4</sub> Br <sub>12</sub> }-4.0  | 71.1 | 65.4 | 1.09 | 23.2 |
| {Nb <sub>2</sub> Ta <sub>4</sub> Br <sub>12</sub> }-2.0  | 81.4 | 77.6 | 1.05 | 16.3 |
| {Nb <sub>2</sub> Ta <sub>4</sub> Br <sub>12</sub> }-1.0  | 83.7 | 81.2 | 1.03 | 15.5 |
|                                                          |      |      |      |      |
| {NbTa <sub>5</sub> Br <sub>12</sub> }-16.0               | 38.6 | 36.2 | 1.07 | 42.5 |
| {NbTa <sub>5</sub> Br <sub>12</sub> }-12.0               | 50.2 | 45.5 | 1.10 | 35.2 |
| {NbTa <sub>5</sub> Br <sub>12</sub> }-8.0                | 61.3 | 56.3 | 1.09 | 27.1 |
| {NbTa <sub>5</sub> Br <sub>12</sub> }-4.0                | 73.8 | 69.3 | 1.06 | 18.8 |
| {NbTa <sub>5</sub> Br <sub>12</sub> }-2.0                | 83.3 | 80.3 | 1.04 | 13.3 |
| {NbTa <sub>5</sub> Br <sub>12</sub> }-1.0                | 87.4 | 85.2 | 1.02 | 11.6 |

## References

1. Lebastard, C.; Wilmet, W.; Cordier, S.; Comby-Zerbino, C.; MacAleese, L.; Dugourd, P.; Uchikoshi, T.; Dorcet, V.; Amela-Cortes, M.; Renaud, A.; et al. Nanoarchitectonics of glass coatings for near-infrared shielding: From solid-state cluster-based niobium chlorides to the shaping of nanocomposite films. *ACS Appl. Mater. Interfaces* **2022**, *14*, 21116–21130.
2. Smith, G.B.; Deller, C.A.; Swift, P.D.; Gentle, A.; Garrett, P.D.; Fisher, W.K. Nanoparticle-doped polymer foils for use in solar control glazing. *J. Nanoparticle Res.* **2002**, *4*, 157–165.
3. Gao, Q.; Wu, X.; Huang, T. Greatly improved NIR shielding performance of CuS nanocrystals by gallium doping for energy efficient window. *Ceram. Int.* **2021**, *47*, 23827–23833.
4. Stiles, W.S.; Burch, J.M. NPL colour-matching investigation: final report (1958). *Opt. Acta: Int. J. Opt.* **1959**, *6*, 1–26.
5. Speranskaya NI. Determination of spectral color co-ordinates for twenty-seven normal observers. *Opt. Spectroscopy*, **1959**, *7*, 424–428.  
<https://www.scopus.com/record/display.uri?eid=2-s2.0-0001307974&origin=inward&txGid=160a89521936d5c60bb09d3e4dc95d35> (accessed on 4 May 2022).
6. Judd DB. *Proc. CIE Symposium on “Advanced Colorimetry”*, CIE Central Bureau, Vienna, Austria, 1993, 107. <https://cie.co.at/publications/proceedings-cie-symposium-advanced-colorimetry-8-10-june-1993-vienna-austria> (accessed on 4 May 2022).
7. Trezona, P.W. Derivation of the 1964 CIE 10° XYZ colour-matching functions and their applicability in photometry. *Color Res. Appl.* **2001**, *26*, 67–75.
8. Lindbloom, B.J. Site gathered the useful color information, **2017**. <http://www.Brucelindbloom.com> (accessed on 4 May 2022).
